# Supplementary material for: Transcriptome Analysis Identifies Strategies Targeting Immune Response-Related Pathways to Control Enterotoxigenic Escherichia coli Infection in Porcine Intestinal Epithelial Cells
Source: Front Vet Sci. 2021 Aug 10;8:677897. doi: 10.3389/fvets.2021.677897 (PMC8383179; doi:10.3389/fvets.2021.677897)
Supplement: Supplementary Table 5 — Annotation of DEGs between CON and LPS groups. [file Table_5.XLS]

## Sheet: 表达差异详情表
TABLE S5 Annotation of DEGs between CON and LPS groups
Gene_id	Gene name	Gene description	FC(EC/CN)	Log2FC(EC/CN)	Pvalue	Padjust	Significant	Regulate	CN	EC	GO_id	GO_term	COG_id	COG_Functional Categories	NR_hit-name	NR_description	Swiss-Prot_hit-name	Swiss-Prot_description	Pfam_id	Domain	Domain description
ENSSSCG00000008533	ALK	ALK receptor tyrosine kinase [Source:NCBI gene;Acc:100518423]	4.398	2.13676	7.94064e-35	1.81934e-32	yes	up	3.09	12.7133	GO:0000187;GO:0042127;GO:0016310;GO:0018108;GO:0021766;GO:0007165;GO:0007169;GO:0046777;GO:0060159;GO:1900006;GO:0090648;GO:0045664;GO:0048666;GO:0006468;GO:0030534;GO:0036269;GO:0007420;GO:0070062;GO:0016021;GO:0016020;GO:0005887;GO:0005886;GO:0043234;GO:0043235;GO:0032991;GO:0004714;GO:0004713;GO:0004672;GO:0005524;GO:004280	BP:activation of MAPK activity;BP:regulation of cell proliferation;BP:phosphorylation;BP:peptidyl-tyrosine phosphorylation;BP:hippocampus development;BP:signal transduction;BP:transmembrane receptor protein tyrosine kinase signaling pathway;BP:protein autophosphorylation;BP:regulation of dopamine receptor signaling pathway;BP:positive regulation of dendrite development;BP:response to environmenta…	ENOG410XPVX	T:Signal transduction mechanisms	XP_020943328.1	ALK tyrosine kinase receptor [Sus scrofa]	sp|Q9UM73|ALK_HUMAN;	ALK tyrosine kinase receptor OS=Homo sapiens OX=9606 GN=ALK PE=1 SV=3;	PF07714.14;PF00069.22;PF00629.20;PF12810.4	Pkinase_Tyr;Pkinase;MAM;Gly_rich	Protein tyrosine kinase;Protein kinase domain;MAM domain, meprin/A5/mu;Glycine rich protein
ENSSSCG00000008963	AREG	amphiregulin [Source:NCBI gene;Acc:397668]	2.051	1.03632	5.3644e-16	7.04304e-14	yes	up	28.4433	55.8033	GO:0008284;GO:0032355;GO:0060750;GO:0050731;GO:0007186;GO:0007173;GO:0060744;GO:0060749;GO:0010469;GO:0060598;GO:0005737;GO:0005615;GO:0016021;GO:0016020;GO:0009986;GO:0005634;GO:0005154;GO:000808	BP:positive regulation of cell proliferation;BP:response to estradiol;BP:epithelial cell proliferation involved in mammary gland duct elongation;BP:positive regulation of peptidyl-tyrosine phosphorylation;BP:G-protein coupled receptor signaling pathway;BP:epidermal growth factor receptor signaling pathway;BP:mammary gland branching involved in thelarche;BP:mammary gland alveolus development;BP:re…	ENOG4112CXY	S:Function unknown	NP_999541.1	amphiregulin precursor [Sus scrofa]	sp|P15514|AREG_HUMAN;	Amphiregulin OS=Homo sapiens OX=9606 GN=AREG PE=1 SV=2;	------	------	------
ENSSSCG00000015595	ATF3	activating transcription factor 3 [Source:NCBI gene;Acc:100738612]	2.706	1.43597	7.00374e-76	4.54659e-73	yes	up	27.25	69.2433	GO:0034198;GO:0010628;GO:0006094;GO:0000122;GO:0035914;GO:0045944;GO:1990440;GO:1903984;GO:0045892;GO:0030968;GO:0006355;GO:0006357;GO:0070373;GO:0005634;GO:1990622;GO:0005730;GO:0003677;GO:0001078;GO:0043565;GO:0042802;GO:0042803;GO:0044212;GO:0001227;GO:0003700;GO:0000976;GO:0000977;GO:0000978;GO:004698	BP:cellular response to amino acid starvation;BP:positive regulation of gene expression;BP:gluconeogenesis;BP:negative regulation of transcription from RNA polymerase II promoter;BP:skeletal muscle cell differentiation;BP:positive regulation of transcription from RNA polymerase II promoter;BP:positive regulation of transcription from RNA polymerase II promoter in response to endoplasmic reticulum…	ENOG4111CH5	K:Transcription	XP_007986692.1	PREDICTED: cyclic AMP-dependent transcription factor ATF-3 [Chlorocebus sabaeus]	sp|P29596|ATF3_RAT;	Cyclic AMP-dependent transcription factor ATF-3 OS=Rattus norvegicus OX=10116 GN=Atf3 PE=2 SV=1;	PF00170.18;PF07716.12;PF03131.14	bZIP_1;bZIP_2;bZIP_Maf	bZIP transcription factor;Basic region leucine zipper;bZIP Maf transcription factor
ENSSSCG00000027426	BCL3	BCL3, transcription coactivator [Source:NCBI gene;Acc:100738193]	2.609	1.38366	3.62899e-10	2.80826e-08	yes	up	6.17667	14.82	GO:0019730;GO:0051101;GO:0042742;GO:0002455;GO:0042981;GO:0002268;GO:0009615;GO:0042536;GO:0043066;GO:0032729;GO:0048536;GO:0045727;GO:0046426;GO:0030330;GO:0045082;GO:0006974;GO:0045892;GO:0045893;GO:0010225;GO:0042771;GO:0002467;GO:0042088;GO:0045064;GO:0045415;GO:0007249;GO:0030198;GO:0045944;GO:0006351;GO:0002315;GO:0042832;GO:1901222;GO:0030496;GO:0005654;GO:0033257;GO:0005737;GO:0005886;GO:…	BP:antimicrobial humoral response;BP:regulation of DNA binding;BP:defense response to bacterium;BP:humoral immune response mediated by circulating immunoglobulin;BP:regulation of apoptotic process;BP:follicular dendritic cell differentiation;BP:response to virus;BP:negative regulation of tumor necrosis factor biosynthetic process;BP:negative regulation of apoptotic process;BP:positive regulation …	COG0666	S:Function unknown	NP_001302645.1	B-cell lymphoma 3 protein [Sus scrofa]	sp|P20749|BCL3_HUMAN;	B-cell lymphoma 3 protein OS=Homo sapiens OX=9606 GN=BCL3 PE=1 SV=2;	PF12796.4;PF13857.3;PF13606.3;PF00023.27;PF13637.3	Ank_2;Ank_5;Ank_3;Ank;Ank_4	Ankyrin repeats;Ankyrin repeats;Ankyrin repeat;Ankyrin repeat;Ankyrin repeats
ENSSSCG00000036136	BHLHE40	basic helix-loop-helix family member e40 [Source:NCBI gene;Acc:100514873]	3.093	1.62887	3.83582e-07	1.79286e-05	yes	up	12.01	35.9567	GO:0032922;GO:0009416;GO:0048511;GO:0007623;GO:0042752;GO:0045892;GO:0043433;GO:0000122;GO:0006355;GO:0043153;GO:0005737;GO:0016604;GO:0005730;GO:0005634;GO:0005794;GO:0003677;GO:0043425;GO:0070888;GO:0043426;GO:0001078;GO:0000980;GO:0001191;GO:0003714;GO:0000981;GO:0042803;GO:0000978;GO:0019904;GO:0001102;GO:0001227;GO:0003705;GO:0046983;GO:004698	BP:circadian regulation of gene expression;BP:response to light stimulus;BP:rhythmic process;BP:circadian rhythm;BP:regulation of circadian rhythm;BP:negative regulation of transcription, DNA-templated;BP:negative regulation of sequence-specific DNA binding transcription factor activity;BP:negative regulation of transcription from RNA polymerase II promoter;BP:regulation of transcription, DNA-tem…	ENOG4111F0X	O:Posttranslational modification, protein turnover, chaperones	XP_010983292.1	PREDICTED: class E basic helix-loop-helix protein 40 [Camelus dromedarius]	sp|B3F209|BHE40_SHEEP;	Class E basic helix-loop-helix protein 40 OS=Ovis aries OX=9940 GN=BHLHE40 PE=2 SV=1;	PF00010.23;PF07527.10	HLH;Hairy_orange	Helix-loop-helix DNA-binding domain;Hairy Orange
ENSSSCG00000028322	BTG2	BTG anti-proliferation factor 2 [Source:NCBI gene;Acc:100048932]	11.377	3.50804	0	0	yes	up	3.53333	38.8733	GO:0006479;GO:0021542;GO:0045930;GO:0009952;GO:0008285;GO:0017148;GO:0006974;GO:0060213;GO:0008306;GO:0031175;GO:0035914;GO:0021954;GO:2000178;GO:0005634;GO:0005737;GO:007006	BP:protein methylation;BP:dentate gyrus development;BP:negative regulation of mitotic cell cycle;BP:anterior/posterior pattern specification;BP:negative regulation of cell proliferation;BP:negative regulation of translation;BP:cellular response to DNA damage stimulus;BP:positive regulation of nuclear-transcribed mRNA pol;BP:associative learning;BP:neuron projection development;BP:skeletal muscle …	ENOG410ZZC0	P:Inorganic ion transport and metabolism	XP_004392848.2	PREDICTED: protein BTG2 [Odobenus rosmarus divergens]	sp|Q04211|BTG2_MOUSE;	Protein BTG2 OS=Mus musculus OX=10090 GN=Btg2 PE=1 SV=1;	PF07742.9	BTG	BTG family
ENSSSCG00000024261	CBX2	chromobox 2 [Source:NCBI gene;Acc:100514916]	0.365	-1.45313	1.28369e-09	9.2592e-08	yes	down	1.25667	0.456667	GO:0000122;GO:0045137;GO:0005654;GO:0031519;GO:0035102;GO:0005634;GO:0000792;GO:0000791;GO:0000785;GO:0035064;GO:0005488;GO:000368	BP:negative regulation of transcription from RNA polymerase II promoter;BP:development of primary sexual characteristics;CC:nucleoplasm;CC:PcG protein complex;CC:PRC1 complex;CC:nucleus;CC:heterochromatin;CC:euchromatin;CC:chromatin;MF:methylated histone binding;MF:binding;MF:chromatin binding;	ENOG4111HE0	K:Transcription	XP_020922165.1	chromobox protein homolog 2 isoform X1 [Sus scrofa]	sp|Q14781|CBX2_HUMAN;	Chromobox protein homolog 2 OS=Homo sapiens OX=9606 GN=CBX2 PE=1 SV=2;	PF00385.21	Chromo	Chromo
ENSSSCG00000026433	CCDC73	coiled-coil domain containing 73 [Source:NCBI gene;Acc:100516315]	3.482	1.79973	6.30659e-05	0.0014365	yes	up	8.61	25.8167	------	------	ENOG4112DB3	S:Function unknown	XP_020938875.1	coiled-coil domain-containing protein 73 [Sus scrofa]	sp|Q6ZRK6|CCD73_HUMAN;	Coiled-coil domain-containing protein 73 OS=Homo sapiens OX=9606 GN=CCDC73 PE=2 SV=2;	PF15818.2	CCDC73	Coiled-coil domain-containing protein 73 family
ENSSSCG00000016254	CCL20	C-C motif chemokine ligand 20 [Source:NCBI gene;Acc:553951]	42.665	5.41498	3.39948e-15	4.09514e-13	yes	up	0.11	5.35333	GO:0070098;GO:0060326;GO:0048247;GO:0071356;GO:0035584;GO:2000406;GO:0010469;GO:0030593;GO:0006935;GO:0006954;GO:0006955;GO:0072678;GO:0072679;GO:0043547;GO:0002548;GO:0007186;GO:0071347;GO:0071346;GO:0070374;GO:0005615;GO:0005576;GO:0005125;GO:0008009;GO:0031731;GO:004802	BP:chemokine-mediated signaling pathway;BP:cell chemotaxis;BP:lymphocyte chemotaxis;BP:cellular response to tumor necrosis factor;BP:calcium-mediated signaling using intracellular calcium source;BP:positive regulation of T cell migration;BP:regulation of receptor activity;BP:neutrophil chemotaxis;BP:chemotaxis;BP:inflammatory response;BP:immune response;BP:T cell migration;BP:thymocyte migration;…	ENOG410ZGME	O:Posttranslational modification, protein turnover, chaperones	XP_012021149.1	PREDICTED: C-C motif chemokine 20 isoform X6 [Ovis aries musimon]	sp|Q8SQB1|CCL20_BOVIN;	C-C motif chemokine 20 OS=Bos taurus OX=9913 GN=CCL20 PE=3 SV=1;	PF00048.17	IL8	Small cytokines
ENSSSCG00000006940	CCN1	cellular communication network factor 1 [Source:NCBI gene;Acc:100153791]	2.712	1.43951	4.07924e-64	2.07243e-61	yes	up	74.04	213.097	GO:0060710;GO:0003281;GO:0060716;GO:0007155;GO:0060591;GO:0030501;GO:0070372;GO:0001934;GO:0043065;GO:0043066;GO:0001649;GO:0060548;GO:0043280;GO:0045669;GO:0002041;GO:0030335;GO:0098609;GO:0010811;GO:0072593;GO:0061036;GO:0001558;GO:0007267;GO:0030513;GO:0045597;GO:0045860;GO:0003278;GO:0033690;GO:0044319;GO:0010518;GO:0030198;GO:0045944;GO:0003181;GO:0060413;GO:2000304;GO:0031012;GO:0005576;GO:…	BP:chorio-allantoic fusion;BP:ventricular septum development;BP:labyrinthine layer blood vessel development;BP:cell adhesion;BP:chondroblast differentiation;BP:positive regulation of bone mineralization;BP:regulation of ERK1 and ERK2 cascade;BP:positive regulation of protein phosphorylation;BP:positive regulation of apoptotic process;BP:negative regulation of apoptotic process;BP:osteoblast diffe…	ENOG41119KZ	O:Posttranslational modification, protein turnover, chaperones	XP_001927775.1	protein CYR61 [Sus scrofa]	sp|O00622|CYR61_HUMAN;	Protein CYR61 OS=Homo sapiens OX=9606 GN=CYR61 PE=1 SV=1;	PF00007.19;PF00093.15;PF00219.15;PF00090.16	Cys_knot;VWC;IGFBP;TSP_1	Cystine-knot domain;von Willebrand factor type C domain;Insulin-like growth factor binding protein;Thrombospondin type 1 domain
ENSSSCG00000004192	CCN2	cellular communication network factor 2 [Source:NCBI gene;Acc:100152141]	2.524	1.33589	6.30365e-05	0.0014365	yes	up	10.69	25.56	GO:0030324;GO:0030154;GO:0007160;GO:0007267;GO:0001502;GO:0001503;GO:0007165;GO:0035988;GO:0001525;GO:0008543;GO:0051496;GO:0032330;GO:0016477;GO:0060548;GO:0072593;GO:0061448;GO:0045597;GO:0046330;GO:0001558;GO:0007155;GO:0001894;GO:0007229;GO:0010629;GO:0070374;GO:0071897;GO:0005794;GO:0031012;GO:0005576;GO:0005578;GO:0008022;GO:0005520;GO:0005178;GO:0008201;GO:000551	BP:lung development;BP:cell differentiation;BP:cell-matrix adhesion;BP:cell-cell signaling;BP:cartilage condensation;BP:ossification;BP:signal transduction;BP:chondrocyte proliferation;BP:angiogenesis;BP:fibroblast growth factor receptor signaling pathway;BP:positive regulation of stress fiber assembly;BP:regulation of chondrocyte differentiation;BP:cell migration;BP:negative regulation of cell d…	ENOG4111F77	S:Function unknown	NP_998998.2	connective tissue growth factor precursor [Sus scrofa]	sp|O19113|CTGF_PIG;	Connective tissue growth factor OS=Sus scrofa OX=9823 GN=CTGF PE=2 SV=1;	PF00007.19;PF00093.15;PF00219.15;PF00090.16	Cys_knot;VWC;IGFBP;TSP_1	Cystine-knot domain;von Willebrand factor type C domain;Insulin-like growth factor binding protein;Thrombospondin type 1 domain
ENSSSCG00000015303	CFAP69	cilia and flagella associated protein 69 [Source:NCBI gene;Acc:100622715]	0.222	-2.16867	4.25611e-15	5.07476e-13	yes	down	195.79	28.6967	GO:1990834;GO:0042048;GO:1902093;GO:1905516;GO:0005737;GO:0097225;GO:009773	BP:response to odorant;BP:olfactory behavior;BP:positive regulation of flagellated sperm motility;BP:positive regulation of fertilization;CC:cytoplasm;CC:sperm midpiece;CC:non-motile cilium;	ENOG410XTAP	S:Function unknown	XP_005667638.2	cilia- and flagella-associated protein 69 isoform X1 [Sus scrofa]	sp|A5D8W1|CFA69_HUMAN;	Cilia- and flagella-associated protein 69 OS=Homo sapiens OX=9606 GN=CFAP69 PE=2 SV=3;	------	------	------
ENSSSCG00000038521	CHAC1	ChaC glutathione specific gamma-glutamylcyclotransferase 1 [Source:NCBI gene;Acc:100524723]	5.661	2.50101	0.000264986	0.0045669	yes	up	2.68	14.8733	GO:0007165;GO:0061928;GO:0006751;GO:0022008;GO:0048523;GO:0005802;GO:0044444;GO:0016829;GO:0005112;GO:000383	BP:signal transduction;BP:old GO;BP:glutathione catabolic process;BP:neurogenesis;BP:negative regulation of cellular process;CC:trans-Golgi network;CC:cytoplasmic part;MF:lyase activity;MF:Notch binding;MF:gamma-glutamylcyclotransferase activity;	COG3703	L:Replication, recombination and repair	XP_014712856.1	PREDICTED: LOW QUALITY PROTEIN: glutathione-specific gamma-glutamylcyclotransferase 1 [Equus asinus]	sp|Q9BUX1|CHAC1_HUMAN;	Glutathione-specific gamma-glutamylcyclotransferase 1 OS=Homo sapiens OX=9606 GN=CHAC1 PE=1 SV=3;	PF04752.9	ChaC	ChaC-like protein
ENSSSCG00000004142	CITED2	Cbp/p300 interacting transactivator with Glu/Asp rich carboxy-terminal domain 2 [Source:NCBI gene;Acc:100156022]	0.438	-1.18969	1.40673e-09	1.00844e-07	yes	down	11.68	4.42	GO:0048568;GO:0030154;GO:0060972;GO:0007530;GO:0001701;GO:0001568;GO:0060562;GO:0048646;GO:0048598;GO:0048608;GO:0003007;GO:0060485;GO:0007178;GO:0044702;GO:0003279;GO:0007399;GO:0006355;GO:0006357;GO:0030097;GO:0048732;GO:0007368;GO:0048522;GO:0005634;GO:0005488;GO:0003713;GO:000110	BP:embryonic organ development;BP:cell differentiation;BP:left/right pattern formation;BP:sex determination;BP:in utero embryonic development;BP:blood vessel development;BP:epithelial tube morphogenesis;BP:anatomical structure formation involved in morphogenesis;BP:embryonic morphogenesis;BP:reproductive structure development;BP:heart morphogenesis;BP:mesenchyme development;BP:transmembrane recep…	ENOG410Y09Y	K:Transcription	XP_012329948.2	cbp/p300-interacting transactivator 2 [Aotus nancymaae]	sp|Q99967|CITE2_HUMAN;	Cbp/p300-interacting transactivator 2 OS=Homo sapiens OX=9606 GN=CITED2 PE=1 SV=2;	PF04487.9	CITED	CITED
ENSSSCG00000012915	CLCF1	cardiotrophin like cytokine factor 1 [Source:NCBI gene;Acc:100513263]	3.444	1.78408	3.12788e-72	1.82746e-69	yes	up	9.55667	32.7667	GO:0008284;GO:0030890;GO:0030183;GO:0048711;GO:0042531;GO:0007259;GO:0048295;GO:0043524;GO:0007166;GO:0010469;GO:0002639;GO:0097059;GO:0097058;GO:0005576;GO:0005127;GO:0005125;GO:0005102;GO:004698	BP:positive regulation of cell proliferation;BP:positive regulation of B cell proliferation;BP:B cell differentiation;BP:positive regulation of astrocyte differentiation;BP:positive regulation of tyrosine phosphorylation of STAT protein;BP:JAK-STAT cascade;BP:positive regulation of isotype switching to IgE isotypes;BP:negative regulation of neuron apoptotic process;BP:cell surface receptor signal…	ENOG4111HCM	A:RNA processing and modification	XP_020938424.1	cardiotrophin-like cytokine factor 1 isoform X2 [Sus scrofa]	sp|Q9QZM3|CLCF1_MOUSE;	Cardiotrophin-like cytokine factor 1 OS=Mus musculus OX=10090 GN=Clcf1 PE=2 SV=1;	PF06875.8;PF01110.14	PRF;CNTF	Plethodontid receptivity factor PRF;Ciliary neurotrophic factor
ENSSSCG00000011264	CSRNP1	cysteine and serine rich nuclear protein 1 [Source:NCBI gene;Acc:100519275]	3.406	1.76794	2.73547e-36	6.80085e-34	yes	up	8.83667	25.7167	GO:0048705;GO:0060021;GO:0009791;GO:0006355;GO:0048008;GO:0060325;GO:0045944;GO:0005634;GO:0043565;GO:0003700;GO:000122	BP:skeletal system morphogenesis;BP:palate development;BP:post-embryonic development;BP:regulation of transcription, DNA-templated;BP:platelet-derived growth factor receptor signaling pathway;BP:face morphogenesis;BP:positive regulation of transcription from RNA polymerase II promoter;CC:nucleus;MF:sequence-specific DNA binding;MF:transcription factor activity, sequence-specific DNA binding;MF:tr…	ENOG410XREB	S:Function unknown	XP_003132171.1	cysteine/serine-rich nuclear protein 1 [Sus scrofa]	sp|Q96S65|CSRN1_HUMAN;	Cysteine/serine-rich nuclear protein 1 OS=Homo sapiens OX=9606 GN=CSRNP1 PE=1 SV=2;	PF16019.2	CSRNP_N	Cysteine/serine-rich nuclear protein N-terminus
ENSSSCG00000008959	CXCL2	chemokine (C-X-C motif) ligand 2 [Source:NCBI gene;Acc:414904]	7.188	2.84551	2.69518e-49	9.26271e-47	yes	up	10.7533	34.7367	GO:0006935;GO:0060326;GO:0006952;GO:0006955;GO:0010469;GO:0005576;GO:0005615;GO:0005125;GO:000800	BP:chemotaxis;BP:cell chemotaxis;BP:defense response;BP:immune response;BP:regulation of receptor activity;CC:extracellular region;CC:extracellular space;MF:cytokine activity;MF:chemokine activity;	ENOG410ZT1C	S:Function unknown	AAS91557.1	chemokine (C-X-C motif) ligand 2 [Sus scrofa]	sp|O46677|GROB_BOVIN;	Growth-regulated protein homolog beta OS=Bos taurus OX=9913 PE=3 SV=1;	PF00048.17	IL8	Small cytokines
ENSSSCG00000008953	CXCL8	C-X-C motif chemokine ligand 8 [Source:NCBI gene;Acc:396880]	3.421	1.77436	2.04807e-77	1.40774e-74	yes	up	17.4267	57.61	GO:0070098;GO:0071222;GO:0030155;GO:0045091;GO:0035556;GO:0061844;GO:0071356;GO:0042119;GO:0044344;GO:0045766;GO:0045744;GO:0010469;GO:0030595;GO:0030593;GO:0006935;GO:2000535;GO:0050930;GO:0007050;GO:0006954;GO:0006955;GO:0048566;GO:0006952;GO:0031623;GO:0071347;GO:0002237;GO:0034976;GO:0005615;GO:0005576;GO:0005125;GO:0008009;GO:000515	BP:chemokine-mediated signaling pathway;BP:cellular response to lipopolysaccharide;BP:regulation of cell adhesion;BP:regulation of single stranded viral RNA replication via double stranded DNA intermediate;BP:intracellular signal transduction;BP:old GO;BP:cellular response to tumor necrosis factor;BP:neutrophil activation;BP:cellular response to fibroblast growth factor stimulus;BP:positive regul…	ENOG410Z1BP	O:Posttranslational modification, protein turnover, chaperones	NP_999032.1	interleukin-8 precursor [Sus scrofa]	sp|P26894|IL8_PIG;	Interleukin-8 OS=Sus scrofa OX=9823 GN=CXCL8 PE=1 SV=1;	PF00048.17	IL8	Small cytokines
ENSSSCG00000031856	DACT1	dishevelled binding antagonist of beta catenin 1 [Source:NCBI gene;Acc:100621416]	0.401	-1.31922	5.185e-13	5.31462e-11	yes	down	4.61667	1.78	GO:0090090;GO:0090263;GO:0030177;GO:0046329;GO:0030178;GO:0032091;GO:0032092;GO:2000134;GO:0000122;GO:1903364;GO:0021915;GO:1904864;GO:0031647;GO:0045732;GO:0060828;GO:0005737;GO:0005634;GO:0005654;GO:0030877;GO:0042826;GO:0051018;GO:0008013;GO:000108	BP:negative regulation of canonical Wnt signaling pathway;BP:positive regulation of canonical Wnt signaling pathway;BP:positive regulation of Wnt signaling pathway;BP:negative regulation of JNK cascade;BP:negative regulation of Wnt signaling pathway;BP:negative regulation of protein binding;BP:positive regulation of protein binding;BP:negative regulation of G1/S transition of mitotic cell cycle;B…	ENOG4110UQH	Z:Cytoskeleton	XP_020958338.1	dapper homolog 1 [Sus scrofa]	sp|Q9NYF0|DACT1_HUMAN;	Dapper homolog 1 OS=Homo sapiens OX=9606 GN=DACT1 PE=1 SV=2;	PF15268.3	Dapper	Dapper
ENSSSCG00000031888	DDIT4	DNA damage inducible transcript 4 [Source:NCBI gene;Acc:100153821]	8.433	3.0761	4.02883e-16	5.34965e-14	yes	up	5.23333	42.7967	GO:0051607;GO:0009968;GO:0008283;GO:0042771;GO:0030182;GO:0033137;GO:1901216;GO:0072593;GO:0048011;GO:0001764;GO:0010801;GO:0045820;GO:0032007;GO:0001666;GO:0043241;GO:0007420;GO:0005737;GO:0005739;GO:0005829;GO:007188	BP:defense response to virus;BP:negative regulation of signal transduction;BP:cell proliferation;BP:intrinsic apoptotic signaling pathway in response to DNA damage by p53 class mediator;BP:neuron differentiation;BP:negative regulation of peptidyl-serine phosphorylation;BP:positive regulation of neuron death;BP:reactive oxygen species metabolic process;BP:neurotrophin TRK receptor signaling pathwa…	ENOG4111N0W	O:Posttranslational modification, protein turnover, chaperones	NP_001230381.1	DNA damage-inducible transcript 4 protein [Sus scrofa]	sp|Q08E62|DDIT4_BOVIN;	DNA damage-inducible transcript 4 protein OS=Bos taurus OX=9913 GN=DDIT4 PE=2 SV=1;	PF07809.8	RTP801_C	RTP801 C-terminal region
ENSSSCG00000013784	DNAJB1	DnaJ heat shock protein family (Hsp40) member B1 [Source:NCBI gene;Acc:396741]	2.797	1.48393	6.79342e-58	3.05312e-55	yes	up	31.52	84.3033	GO:0000122;GO:0090084;GO:0006457;GO:0032781;GO:0051085;GO:0070389;GO:0097201;GO:0005737;GO:0070062;GO:0005730;GO:0005634;GO:0005829;GO:0051117;GO:0030544;GO:0051087;GO:0051082;GO:0003714;GO:000167	BP:negative regulation of transcription from RNA polymerase II promoter;BP:negative regulation of inclusion body assembly;BP:protein folding;BP:positive regulation of ATPase activity;BP:chaperone mediated protein folding requiring cofactor;BP:chaperone cofactor-dependent protein refolding;BP:negative regulation of transcription from RNA polymerase II promoter in response to stress;CC:cytoplasm;CC…	COG0484	I:Lipid transport and metabolism	NP_001231359.1	dnaJ homolog subfamily B member 1 [Sus scrofa]	sp|Q3MI00|DNJB1_BOVIN;	DnaJ homolog subfamily B member 1 OS=Bos taurus OX=9913 GN=DNAJB1 PE=2 SV=3;	PF01556.15;PF00226.28	DnaJ_C;DnaJ	DnaJ C terminal domain;DnaJ domain
ENSSSCG00000016991	DUSP1	dual specificity phosphatase 1 [Source:NCBI gene;Acc:100522469]	3.684	1.88141	2.75506e-07	1.32481e-05	yes	up	17.6967	68.7	GO:0008285;GO:0016311;GO:0006470;GO:0000188;GO:0043407;GO:0007162;GO:1903753;GO:0035335;GO:0043409;GO:0090027;GO:0035970;GO:0070262;GO:1990869;GO:0005737;GO:0005634;GO:0016791;GO:0016787;GO:0051019;GO:0008138;GO:0017017;GO:0004725;GO:0004722;GO:000472	BP:negative regulation of cell proliferation;BP:dephosphorylation;BP:protein dephosphorylation;BP:inactivation of MAPK activity;BP:negative regulation of MAP kinase activity;BP:negative regulation of cell adhesion;BP:negative regulation of p38MAPK cascade;BP:peptidyl-tyrosine dephosphorylation;BP:negative regulation of MAPK cascade;BP:negative regulation of monocyte chemotaxis;BP:peptidyl-threoni…	COG2453	J:Translation, ribosomal structure and biogenesis	NP_001243004.1	dual specificity protein phosphatase 1 [Sus scrofa]	sp|P28562|DUS1_HUMAN;	Dual specificity protein phosphatase 1 OS=Homo sapiens OX=9606 GN=DUSP1 PE=1 SV=3;	PF00782.17;PF00581.17;PF00102.24	DSPc;Rhodanese;Y_phosphatase	Dual specificity phosphatase, catalytic domain;Rhodanese-like domain;Protein-tyrosine phosphatase
ENSSSCG00000040815	DUSP5	dual specificity phosphatase 5 [Source:NCBI gene;Acc:100157144]	2.364	1.2414	2.28121e-53	9.19172e-51	yes	up	17.0833	38.6733	GO:0016311;GO:0006470;GO:0000188;GO:0035970;GO:0035335;GO:0016787;GO:0016791;GO:0008138;GO:0004725;GO:0017017;GO:000472	BP:dephosphorylation;BP:protein dephosphorylation;BP:inactivation of MAPK activity;BP:peptidyl-threonine dephosphorylation;BP:peptidyl-tyrosine dephosphorylation;MF:hydrolase activity;MF:phosphatase activity;MF:protein tyrosine/serine/threonine phosphatase activity;MF:protein tyrosine phosphatase activity;MF:MAP kinase tyrosine/serine/threonine phosphatase activity;MF:phosphoprotein phosphatase a…	COG2453	A:RNA processing and modification	XP_003904297.2	dual specificity protein phosphatase 5 [Papio anubis]	sp|Q16690|DUS5_HUMAN;	Dual specificity protein phosphatase 5 OS=Homo sapiens OX=9606 GN=DUSP5 PE=1 SV=2;	PF00782.17;PF00581.17;PF00102.24	DSPc;Rhodanese;Y_phosphatase	Dual specificity phosphatase, catalytic domain;Rhodanese-like domain;Protein-tyrosine phosphatase
ENSSSCG00000035598	EDN1	endothelin 1 [Source:NCBI gene;Acc:396915]	2.747	1.45803	1.68493e-35	4.01804e-33	yes	up	3.32667	8.83	GO:0008284;GO:0045840;GO:0019722;GO:0019229;GO:0045987;GO:0001501;GO:0010827;GO:0010613;GO:0008217;GO:0007166;GO:0042310;GO:0043507;GO:0001666;GO:0030072;GO:0051771;GO:0014032;GO:0001701;GO:0045793;GO:0000122;GO:0048661;GO:0006885;GO:0001569;GO:0061051;GO:0048514;GO:0010460;GO:0035810;GO:0007186;GO:0030185;GO:0030335;GO:0042313;GO:0007589;GO:0031583;GO:0007585;GO:0014824;GO:0014826;GO:0060585;GO:…	BP:positive regulation of cell proliferation;BP:positive regulation of mitotic nuclear division;BP:calcium-mediated signaling;BP:regulation of vasoconstriction;BP:positive regulation of smooth muscle contraction;BP:skeletal system development;BP:regulation of glucose transport;BP:positive regulation of cardiac muscle hypertrophy;BP:regulation of blood pressure;BP:cell surface receptor signaling p…	ENOG4111WED	O:Posttranslational modification, protein turnover, chaperones	NP_999047.1	endothelin-1 preproprotein [Sus scrofa]	sp|P09558|EDN1_PIG;	Endothelin-1 OS=Sus scrofa OX=9823 GN=EDN1 PE=1 SV=1;	PF00322.14	Endothelin	Endothelin family
ENSSSCG00000014336	EGR1	early growth response 1 [Source:NCBI gene;Acc:100520726]	11.619	3.53836	1.21275e-38	3.45634e-36	yes	up	10.2667	115.667	GO:0032922;GO:0071480;GO:2000182;GO:0030509;GO:0010628;GO:0070498;GO:0032868;GO:0098759;GO:0001666;GO:0061418;GO:0060086;GO:0000122;GO:0042981;GO:0071310;GO:0050725;GO:0045893;GO:0006366;GO:0033233;GO:0090090;GO:0030217;GO:0045080;GO:0035914;GO:0072303;GO:0060337;GO:0046886;GO:0002931;GO:0071506;GO:0071504;GO:0044849;GO:0009749;GO:0006355;GO:0006357;GO:0045944;GO:0045475;GO:0005737;GO:0005634;GO:…	BP:circadian regulation of gene expression;BP:cellular response to gamma radiation;BP:regulation of progesterone biosynthetic process;BP:BMP signaling pathway;BP:positive regulation of gene expression;BP:interleukin-1-mediated signaling pathway;BP:response to insulin;BP:cellular response to interleukin-8;BP:response to hypoxia;BP:regulation of transcription from RNA polymerase II promoter in resp…	COG5048	S:Function unknown	XP_008012755.1	PREDICTED: early growth response protein 1 [Chlorocebus sabaeus]	sp|P18146|EGR1_HUMAN;	Early growth response protein 1 OS=Homo sapiens OX=9606 GN=EGR1 PE=1 SV=1;	PF11914.5;PF11928.5;PF13465.3;PF00096.23;PF13894.3	DUF3432;DUF3446;zf-H2C2_2;zf-C2H2;zf-C2H2_4	Domain of unknown function;Domain of unknown function;Zinc-finger double domain;Zinc finger, C2H2 type;C2H2-type zinc finger
ENSSSCG00000003471	EPHA2	EPH receptor A2 [Source:NCBI gene;Acc:100522873]	2.036	1.02583	1.44805e-66	7.69112e-64	yes	up	44.6767	88.1267	GO:0006954;GO:0016310;GO:0048570;GO:0018108;GO:0070848;GO:0001501;GO:0051898;GO:0060326;GO:0007169;GO:0001649;GO:0090004;GO:0050830;GO:0030182;GO:0045765;GO:0036342;GO:0033628;GO:0060444;GO:0048514;GO:1904238;GO:0016477;GO:0007411;GO:1903348;GO:0002043;GO:0006468;GO:0070309;GO:0021915;GO:0030216;GO:0060035;GO:0030316;GO:1903078;GO:1901491;GO:0046058;GO:0043535;GO:0033598;GO:0048013;GO:0072659;GO:…	BP:inflammatory response;BP:phosphorylation;BP:notochord morphogenesis;BP:peptidyl-tyrosine phosphorylation;BP:response to growth factor;BP:skeletal system development;BP:negative regulation of protein kinase B signaling;BP:cell chemotaxis;BP:transmembrane receptor protein tyrosine kinase signaling pathway;BP:osteoblast differentiation;BP:positive regulation of establishment of protein localizati…	COG0515	O:Posttranslational modification, protein turnover, chaperones	XP_005665094.1	ephrin type-A receptor 2 [Sus scrofa]	sp|P29317|EPHA2_HUMAN;	Ephrin type-A receptor 2 OS=Homo sapiens OX=9606 GN=EPHA2 PE=1 SV=2;	PF07714.14;PF01404.16;PF00069.22;PF00041.18;PF00536.27;PF14575.3;PF07647.14;PF16656.2;PF09294.7;PF07699.10	Pkinase_Tyr;Ephrin_lbd;Pkinase;fn3;SAM_1;EphA2_TM;SAM_2;Pur_ac_phosph_N;Interfer-bind;Ephrin_rec_like	Protein tyrosine kinase;Ephrin receptor ligand binding domain;Protein kinase domain;Fibronectin type III domain;SAM domain;Ephrin type-A receptor 2 transmembrane domain;SAM domain;Purple acid Phosphatase, N-terminal domain;Interferon-alpha/beta receptor, fibronectin type III;Putative ephrin-receptor like
ENSSSCG00000035774	ERRFI1	ERBB receptor feedback inhibitor 1 [Source:NCBI gene;Acc:100738544]	3.138	1.64977	1.36334e-47	4.55162e-45	yes	up	23.2567	70.5533	GO:0030324;GO:0060428;GO:0042059;GO:0007175;GO:0048286;GO:0060426;GO:0045616;GO:0031953;GO:0001933;GO:0043589;GO:0005737;GO:0005829;GO:0031234;GO:001990	BP:lung development;BP:lung epithelium development;BP:negative regulation of epidermal growth factor receptor signaling pathway;BP:negative regulation of epidermal growth factor-activated receptor activity;BP:lung alveolus development;BP:lung vasculature development;BP:regulation of keratinocyte differentiation;BP:negative regulation of protein autophosphorylation;BP:negative regulation of protei…	ENOG4111HB5	O:Posttranslational modification, protein turnover, chaperones	XP_020950934.1	LOW QUALITY PROTEIN: ERBB receptor feedback inhibitor 1 [Sus scrofa]	sp|P05432|ERRFI_RAT;	ERBB receptor feedback inhibitor 1 OS=Rattus norvegicus OX=10116 GN=Errfi1 PE=1 SV=1;	PF11555.5;PF09027.7	Inhibitor_Mig-6;GTPase_binding	EGFR receptor inhibitor Mig-6;GTPase binding
ENSSSCG00000037501	FANCF	FA complementation group F [Source:NCBI gene;Acc:100519701]	0.47	-1.09002	2.50199e-05	0.000657752	yes	down	2.32333	1.06333	GO:0036297;GO:004324	BP:interstrand cross-link repair;CC:Fanconi anaemia nuclear complex;	ENOG4111WMC	O:Posttranslational modification, protein turnover, chaperones	XP_005674615.2	Fanconi anemia group F protein [Sus scrofa]	sp|Q9NPI8|FANCF_HUMAN;	Fanconi anemia group F protein OS=Homo sapiens OX=9606 GN=FANCF PE=1 SV=1;	PF11107.5	FANCF	Fanconi anemia group F protein
ENSSSCG00000005981	FBXO32	F-box protein 32 [Source:NCBI gene;Acc:733657]	0.487	-1.03791	0.00246488	0.0263127	yes	down	0.596667	0.366667	GO:0071549;GO:0014894;GO:0016567;GO:0006511;GO:0005737;GO:0005654;GO:0005634;GO:0019005;GO:0005829;GO:0030018;GO:0005515;GO:000484	BP:cellular response to dexamethasone stimulus;BP:response to denervation involved in regulation of muscle adaptation;BP:protein ubiquitination;BP:ubiquitin-dependent protein catabolic process;CC:cytoplasm;CC:nucleoplasm;CC:nucleus;CC:SCF ubiquitin ligase complex;CC:cytosol;CC:Z disc;MF:protein binding;MF:ubiquitin-protein transferase activity;	ENOG410YPWK	S:Function unknown	XP_007999672.1	PREDICTED: F-box only protein 32 [Chlorocebus sabaeus]	sp|Q1A730|FBX32_PIG;	F-box only protein 32 OS=Sus scrofa OX=9823 GN=FBXO32 PE=2 SV=1;	PF06881.8	Elongin_A	RNA polymerase II transcription factor SIII
ENSSSCG00000023303	FIGNL1	fidgetin like 1 [Source:NCBI gene;Acc:100625562]	0.35	-1.51398	2.15414e-21	3.18621e-19	yes	down	5.16333	1.70667	GO:0010569;GO:0071479;GO:0007140;GO:0051726;GO:0051013;GO:0033687;GO:0031122;GO:0043066;GO:0001649;GO:2001243;GO:0005737;GO:0070062;GO:0005634;GO:0000228;GO:0048471;GO:0008568;GO:0016887;GO:0005524;GO:000016	BP:regulation of double-strand break repair via homologous recombination;BP:cellular response to ionizing radiation;BP:male meiosis;BP:regulation of cell cycle;BP:microtubule severing;BP:osteoblast proliferation;BP:cytoplasmic microtubule organization;BP:negative regulation of apoptotic process;BP:osteoblast differentiation;BP:negative regulation of intrinsic apoptotic signaling pathway;CC:cytopl…	COG0464	S:Function unknown	XP_003357655.1	fidgetin-like protein 1 [Sus scrofa]	sp|Q6PIW4|FIGL1_HUMAN;	Fidgetin-like protein 1 OS=Homo sapiens OX=9606 GN=FIGNL1 PE=1 SV=2;	PF00004.26;PF09336.7;PF05496.9;PF07728.11	AAA;Vps4_C;RuvB_N;AAA_5	ATPase family associated with various cellular activities;Vps4 C terminal oligomerisation domain;Holliday junction DNA helicase ruvB N-terminus;AAA domain
ENSSSCG00000011972	FILIP1L	filamin A interacting protein 1 like [Source:NCBI gene;Acc:100157058]	0.475	-1.07431	2.24105e-09	1.53138e-07	yes	down	13.8233	6.35	------	------	ENOG410ZUGY	S:Function unknown	XP_020926969.1	filamin A-interacting protein 1-like isoform X1 [Sus scrofa]	sp|Q4L180|FIL1L_HUMAN;	Filamin A-interacting protein 1-like OS=Homo sapiens OX=9606 GN=FILIP1L PE=1 SV=2;	PF09727.6	CortBP2	Cortactin-binding protein-2
ENSSSCG00000002383	FOS	Fos proto-oncogene, AP-1 transcription factor subunit [Source:NCBI gene;Acc:100144486]	9.866	3.30245	3.19204e-78	2.33119e-75	yes	up	4.35333	38.9867	GO:0035994;GO:0035914;GO:0045672;GO:0034614;GO:0071277;GO:0071276;GO:0045893;GO:0007179;GO:0031668;GO:0007399;GO:0060395;GO:0042493;GO:0010468;GO:0006355;GO:0006357;GO:0045944;GO:0005783;GO:0005634;GO:0005654;GO:0032993;GO:0005829;GO:0005667;GO:0035976;GO:0001077;GO:0003677;GO:0043565;GO:0070412;GO:0000982;GO:0046982;GO:0008134;GO:0001102;GO:0044212;GO:0003682;GO:0003700;GO:0001228;GO:0000978;GO:…	BP:response to muscle stretch;BP:skeletal muscle cell differentiation;BP:positive regulation of osteoclast differentiation;BP:cellular response to reactive oxygen species;BP:cellular response to calcium ion;BP:cellular response to cadmium ion;BP:positive regulation of transcription, DNA-templated;BP:transforming growth factor beta receptor signaling pathway;BP:cellular response to extracellular s…	ENOG4111CH5	U:Intracellular trafficking, secretion, and vesicular transport	NP_001116585.1	proto-oncogene c-Fos [Sus scrofa]	sp|O97930|FOS_PIG;	Proto-oncogene c-Fos OS=Sus scrofa OX=9823 GN=FOS PE=3 SV=2;	PF00170.18;PF07716.12;PF03131.14	bZIP_1;bZIP_2;bZIP_Maf	bZIP transcription factor;Basic region leucine zipper;bZIP Maf transcription factor
ENSSSCG00000031616	FOSB	FosB proto-oncogene, AP-1 transcription factor subunit [Source:NCBI gene;Acc:110261009]	21.054	4.396	1.33468e-60	6.23828e-58	yes	up	0.226667	4.17	GO:0071277;GO:0006355;GO:0006357;GO:0045944;GO:0043231;GO:0005634;GO:0005654;GO:0003700;GO:0001228;GO:0003677;GO:000097	BP:cellular response to calcium ion;BP:regulation of transcription, DNA-templated;BP:regulation of transcription from RNA polymerase II promoter;BP:positive regulation of transcription from RNA polymerase II promoter;CC:intracellular membrane-bounded organelle;CC:nucleus;CC:nucleoplasm;MF:transcription factor activity, sequence-specific DNA binding;MF:transcriptional activator activity, RNA polym…	ENOG4111CH5	L:Replication, recombination and repair	XP_006901296.1	PREDICTED: protein fosB isoform X1 [Elephantulus edwardii]	sp|Q9TUB3|FOSB_CANLF;	Protein fosB OS=Canis lupus familiaris OX=9615 GN=FOSB PE=3 SV=1;	PF00170.18;PF07716.12;PF03131.14	bZIP_1;bZIP_2;bZIP_Maf	bZIP transcription factor;Basic region leucine zipper;bZIP Maf transcription factor
ENSSSCG00000008754	GBA3	cytosolic beta-glucosidase [Source:NCBI gene;Acc:100737183]	0.088	-3.50626	7.12348e-103	6.93649e-100	yes	down	1604.13	138.777	GO:0005975;GO:0046477;GO:0005829;GO:0008422;GO:0004565;GO:0004553;GO:001704	BP:carbohydrate metabolic process;BP:glycosylceramide catabolic process;CC:cytosol;MF:beta-glucosidase activity;MF:beta-galactosidase activity;MF:hydrolase activity, hydrolyzing O-glycosyl compounds;MF:glycosylceramidase activity;	COG2723	G:Carbohydrate transport and metabolism	XP_020956729.1	cytosolic beta-glucosidase [Sus scrofa]	sp|Q5RF65|GBA3_PONAB;	Cytosolic beta-glucosidase OS=Pongo abelii OX=9601 GN=GBA3 PE=2 SV=1;	PF00232.15	Glyco_hydro_1	Glycosyl hydrolase family 1
ENSSSCG00000014054	GPRIN1	G protein regulated inducer of neurite outgrowth 1 [Source:NCBI gene;Acc:100525508]	0.475	-1.07506	0.00547736	0.0483041	yes	down	0.636667	0.293333	GO:0031175;GO:0005886;GO:005121	BP:neuron projection development;CC:plasma membrane;MF:phosphoprotein binding;	ENOG410YQX7	O:Posttranslational modification, protein turnover, chaperones	XP_013850329.2	G protein-regulated inducer of neurite outgrowth 1 isoform X1 [Sus scrofa]	sp|Q7Z2K8|GRIN1_HUMAN;	G protein-regulated inducer of neurite outgrowth 1 OS=Homo sapiens OX=9606 GN=GPRIN1 PE=1 SV=2;	PF15235.3	GRIN_C	G protein-regulated inducer of neurite outgrowth C-terminus
ENSSSCG00000000234	GRASP	general receptor for phosphoinositides 1 associated scaffold protein [Source:NCBI gene;Acc:100522015]	2.017	1.01218	7.13353e-05	0.0015847	yes	up	0.703333	1.37667	GO:0099152;GO:0007165;GO:0005886;GO:0098978;GO:0098685;GO:000551	old GO;BP:signal transduction;CC:plasma membrane;CC:glutamatergic synapse;CC:old GO;MF:protein binding;	ENOG410ZJVP;ENOG4110362	U:Intracellular trafficking, secretion, and vesicular transport;	XP_003126196.2	general receptor for phosphoinositides 1-associated scaffold protein [Sus scrofa]	sp|Q7Z6J2|GRASP_HUMAN;	General receptor for phosphoinositides 1-associated scaffold protein OS=Homo sapiens OX=9606 GN=GRASP PE=1 SV=1;	PF00595.21;PF13180.3	PDZ;PDZ_2	PDZ domain;PDZ domain
ENSSSCG00000031821	HASPIN	histone H3 associated protein kinase [Source:NCBI gene;Acc:100621596]	0.42	-1.24996	1.27415e-12	1.29465e-10	yes	down	5.91667	2.40667	GO:0006468;GO:2000751;GO:0016043;GO:0071459;GO:0007064;GO:0035556;GO:0050794;GO:0007049;GO:0005737;GO:0015630;GO:0005813;GO:0005634;GO:0044430;GO:0005819;GO:0000166;GO:0004674;GO:0005524;GO:0004672;GO:007235	BP:protein phosphorylation;BP:histone H3-T3 phosphorylation involved in chromosome passenger complex localization to kinetochore;BP:cellular component organization;BP:protein localization to chromosome, centromeric region;BP:mitotic sister chromatid cohesion;BP:intracellular signal transduction;BP:regulation of cellular process;BP:cell cycle;CC:cytoplasm;CC:microtubule cytoskeleton;CC:centrosome;…	COG5072	D:Cell cycle control, cell division, chromosome partitioning	XP_020923343.1	LOW QUALITY PROTEIN: serine/threonine-protein kinase haspin [Sus scrofa]	sp|Q2KIP2|HASP_BOVIN;	Serine/threonine-protein kinase haspin OS=Bos taurus OX=9913 GN=HASPIN PE=2 SV=1;	PF12330.5;PF00069.22	DUF3635;Pkinase	Domain of unknown function;Protein kinase domain
ENSSSCG00000014362	HBEGF	heparin binding EGF like growth factor [Source:NCBI gene;Acc:397564]	2.596	1.37626	2.19784e-75	1.35167e-72	yes	up	30.8067	77.2967	GO:0090303;GO:0048661;GO:0060326;GO:0035313;GO:0051897;GO:0051716;GO:0051549;GO:0016477;GO:0010469;GO:0008284;GO:0030335;GO:0008016;GO:0007173;GO:0050731;GO:0048522;GO:0005615;GO:0016021;GO:0016020;GO:0009986;GO:0005887;GO:0005886;GO:0005576;GO:0005488;GO:0005154;GO:0008201;GO:000808	BP:positive regulation of wound healing;BP:positive regulation of smooth muscle cell proliferation;BP:cell chemotaxis;BP:wound healing, spreading of epidermal cells;BP:positive regulation of protein kinase B signaling;BP:cellular response to stimulus;BP:positive regulation of keratinocyte migration;BP:cell migration;BP:regulation of receptor activity;BP:positive regulation of cell proliferation;B…	ENOG41120D3	U:Intracellular trafficking, secretion, and vesicular transport	NP_999464.1	proheparin-binding EGF-like growth factor precursor [Sus scrofa]	sp|Q01580|HBEGF_PIG;	Proheparin-binding EGF-like growth factor OS=Sus scrofa OX=9823 GN=HBEGF PE=2 SV=2;	PF00008.24	EGF	EGF-like domain
ENSSSCG00000016313	HJURP	Holliday junction recognition protein [Source:NCBI gene;Acc:100154630]	0.388	-1.36677	2.14168e-15	2.60683e-13	yes	down	3.73667	1.4	GO:0034080;GO:0051101;GO:0007059;GO:0043254;GO:0005737;GO:0005829;GO:0005730;GO:0005634;GO:0005739;GO:0000775;GO:0000777;GO:0042393;GO:004280	BP:CENP-A containing nucleosome assembly;BP:regulation of DNA binding;BP:chromosome segregation;BP:regulation of protein complex assembly;CC:cytoplasm;CC:cytosol;CC:nucleolus;CC:nucleus;CC:mitochondrion;CC:chromosome, centromeric region;CC:condensed chromosome kinetochore;MF:histone binding;MF:identical protein binding;	ENOG4111C4D	S:Function unknown	XP_001925760.2	Holliday junction recognition protein [Sus scrofa]	sp|Q8NCD3|HJURP_HUMAN;	Holliday junction recognition protein OS=Homo sapiens OX=9606 GN=HJURP PE=1 SV=2;	PF12346.5;PF12347.5;PF10384.6	HJURP_mid;HJURP_C;Scm3	Holliday junction recognition protein-associated repeat;Holliday junction regulator protein family C-terminal repeat;Centromere protein Scm3
ENSSSCG00000010573	HPS6	HPS6, biogenesis of lysosomal organelles complex 2 subunit 3 [Source:NCBI gene;Acc:100049675]	0.456	-1.13292	1.64994e-05	0.000471382	yes	down	9.55333	4.23	------	------	ENOG41102BX	S:Function unknown	NP_001092060.1	Hermansky-Pudlak syndrome 6 protein [Sus scrofa]	sp|Q86YV9|HPS6_HUMAN;	Hermansky-Pudlak syndrome 6 protein OS=Homo sapiens OX=9606 GN=HPS6 PE=1 SV=1;	------	------	------
ENSSSCG00000011404	HYAL1	hyaluronidase 1 [Source:NCBI gene;Acc:404698]	2.27	1.18243	0.00207659	0.0232423	yes	up	0.403333	0.896667	GO:0008152;GO:0030308;GO:0030307;GO:0000302;GO:0046677;GO:0045927;GO:0045785;GO:0071356;GO:0009615;GO:0036120;GO:0044344;GO:0045766;GO:1900087;GO:0030212;GO:0030213;GO:0030214;GO:0060272;GO:0071493;GO:0006954;GO:0010634;GO:0051216;GO:0005975;GO:0050679;GO:0071347;GO:0071467;GO:1900106;GO:0005737;GO:0005615;GO:0070062;GO:0036117;GO:0005764;GO:0031410;GO:0016798;GO:0016787;GO:0008134;GO:0003824;GO:…	BP:metabolic process;BP:negative regulation of cell growth;BP:positive regulation of cell growth;BP:response to reactive oxygen species;BP:response to antibiotic;BP:positive regulation of growth;BP:positive regulation of cell adhesion;BP:cellular response to tumor necrosis factor;BP:response to virus;BP:cellular response to platelet-derived growth factor stimulus;BP:cellular response to fibroblas…	ENOG410XPZT	G:Carbohydrate transport and metabolism	NP_999606.1	hyaluronidase-1 precursor [Sus scrofa]	sp|Q6RHW4|HYAL1_PIG;	Hyaluronidase-1 OS=Sus scrofa OX=9823 GN=HYAL1 PE=2 SV=1;	PF01630.15	Glyco_hydro_56	Hyaluronidase
ENSSSCG00000013753	IER2	immediate early response 2 [Source:NCBI gene;Acc:100525209]	2.626	1.39299	5.91569e-24	1.00181e-21	yes	up	30.9467	78.05	GO:0048870;GO:0045944;GO:0005737;GO:0005634;GO:0005654;GO:0044424;GO:0001228;GO:0000977;GO:000367	BP:cell motility;BP:positive regulation of transcription from RNA polymerase II promoter;CC:cytoplasm;CC:nucleus;CC:nucleoplasm;CC:intracellular part;MF:transcriptional activator activity, RNA polymerase II transcription regulatory region sequence-specific binding;MF:RNA polymerase II regulatory region sequence-specific DNA binding;MF:DNA binding;	ENOG410Z3CN	O:Posttranslational modification, protein turnover, chaperones	XP_003123390.1	immediate early response gene 2 protein [Sus scrofa]	sp|Q9BTL4|IER2_HUMAN;	Immediate early response gene 2 protein OS=Homo sapiens OX=9606 GN=IER2 PE=1 SV=1;	PF05760.9	IER	Immediate early response protein
ENSSSCG00000027607	IER3	immediate early response 3 [Source:NCBI gene;Acc:100154770]	3.029	1.599	3.50026e-68	1.94764e-65	yes	up	49.1	146.17	GO:2001020;GO:0010941;GO:0043066;GO:000563	BP:regulation of response to DNA damage stimulus;BP:regulation of cell death;BP:negative regulation of apoptotic process;CC:nucleus;	ENOG410Z2E4	U:Intracellular trafficking, secretion, and vesicular transport	BAD08437.1	immediate early response 3 [Sus scrofa]	sp|P46695|IEX1_HUMAN;	Radiation-inducible immediate-early gene IEX-1 OS=Homo sapiens OX=9606 GN=IER3 PE=1 SV=4;	------	------	------
ENSSSCG00000040725	IL11	interleukin 11 [Source:NCBI gene;Acc:110261056]	6.335	2.66326	1.49423e-09	1.05819e-07	yes	up	0.96	5.90667	GO:0008284;GO:0044700;GO:0033138;GO:0050731;GO:0043410;GO:0045944;GO:0023051;GO:0046888;GO:0010646;GO:0010469;GO:0001934;GO:0005737;GO:0005125;GO:0008083;GO:0005142;GO:000510	BP:positive regulation of cell proliferation;BP:single organism signaling;BP:positive regulation of peptidyl-serine phosphorylation;BP:positive regulation of peptidyl-tyrosine phosphorylation;BP:positive regulation of MAPK cascade;BP:positive regulation of transcription from RNA polymerase II promoter;BP:regulation of signaling;BP:negative regulation of hormone secretion;BP:regulation of cell com…	ENOG411181Z	O:Posttranslational modification, protein turnover, chaperones	XP_020950667.1	interleukin-11 [Sus scrofa]	sp|P20809|IL11_HUMAN;	Interleukin-11 OS=Homo sapiens OX=9606 GN=IL11 PE=1 SV=1;	PF07400.8	IL11	Interleukin 11
ENSSSCG00000008090	IL1A	interleukin 1 alpha [Source:NCBI gene;Acc:397094]	2.341	1.22736	1.22277e-14	1.42996e-12	yes	up	4.01333	9.07667	GO:0045840;GO:0034605;GO:0097192;GO:0010628;GO:0001660;GO:0019221;GO:0045766;GO:0046688;GO:0010469;GO:0002248;GO:0043123;GO:0008285;GO:0035234;GO:0045086;GO:0046330;GO:0006954;GO:0006955;GO:0050715;GO:0050714;GO:0051781;GO:0045944;GO:0010575;GO:0005615;GO:0005829;GO:0005576;GO:0005125;GO:0005149;GO:000550	BP:positive regulation of mitotic nuclear division;BP:cellular response to heat;BP:extrinsic apoptotic signaling pathway in absence of ligand;BP:positive regulation of gene expression;BP:fever generation;BP:cytokine-mediated signaling pathway;BP:positive regulation of angiogenesis;BP:response to copper ion;BP:regulation of receptor activity;BP:connective tissue replacement involved in inflammator…	ENOG411151X	K:Transcription	NP_999194.1	interleukin-1 alpha precursor [Sus scrofa]	sp|P18430|IL1A_PIG;	Interleukin-1 alpha OS=Sus scrofa OX=9823 GN=IL1A PE=2 SV=1;	PF02394.13;PF00340.16	IL1_propep;IL1	Interleukin-1 propeptide;Interleukin-1 / 18
ENSSSCG00000020970	IL6	interleukin 6 [Source:NCBI gene;Acc:399500]	2.558	1.3549	8.34296e-07	3.50675e-05	yes	up	1.71	4.33667	GO:0033138;GO:0019221;GO:0032966;GO:0010628;GO:0051024;GO:0031175;GO:0071222;GO:0002384;GO:0072540;GO:0042531;GO:0043065;GO:0043066;GO:0060252;GO:0001781;GO:0032722;GO:0008284;GO:0090091;GO:0046427;GO:0048661;GO:0070301;GO:0042102;GO:2000866;GO:0006953;GO:0045893;GO:0006954;GO:0006955;GO:0050871;GO:0070102;GO:0002675;GO:0043410;GO:0051091;GO:0045727;GO:0051607;GO:0010718;GO:0050731;GO:0010469;GO:…	BP:positive regulation of peptidyl-serine phosphorylation;BP:cytokine-mediated signaling pathway;BP:negative regulation of collagen biosynthetic process;BP:positive regulation of gene expression;BP:positive regulation of immunoglobulin secretion;BP:neuron projection development;BP:cellular response to lipopolysaccharide;BP:hepatic immune response;BP:T-helper 17 cell lineage commitment;BP:positive…	ENOG4112BXV	O:Posttranslational modification, protein turnover, chaperones	NP_999564.1	interleukin-6 precursor [Sus scrofa]	sp|P26893|IL6_PIG;	Interleukin-6 OS=Sus scrofa OX=9823 GN=IL6 PE=2 SV=2;	PF00489.14;PF16647.2;PF16649.2	IL6;GCSF;IL23	Interleukin-6/G-CSF/MGF family;Granulocyte colony-stimulating factor;Interleukin 23 subunit alpha
ENSSSCG00000016420	INSIG1	insulin induced gene 1 [Source:NCBI gene;Acc:403162]	3.729	1.89893	0.000424268	0.00660129	yes	up	16.06	44.2867	GO:0060363;GO:0060021;GO:0042632;GO:0070862;GO:1901303;GO:0010894;GO:0008202;GO:0016126;GO:0032933;GO:0006629;GO:0006641;GO:0036316;GO:0036315;GO:0045599;GO:0008203;GO:0042472;GO:0042474;GO:0006991;GO:0006695;GO:0045717;GO:0032937;GO:0005783;GO:0016021;GO:0016020;GO:000578	BP:cranial suture morphogenesis;BP:palate development;BP:cholesterol homeostasis;BP:negative regulation of protein exit from endoplasmic reticulum;BP:negative regulation of cargo loading into COPII-coated vesicle;BP:negative regulation of steroid biosynthetic process;BP:steroid metabolic process;BP:sterol biosynthetic process;BP:SREBP signaling pathway;BP:lipid metabolic process;BP:triglyceride m…	ENOG410XQ2M	U:Intracellular trafficking, secretion, and vesicular transport	NP_001231450.1	insulin-induced gene 1 protein [Sus scrofa]	sp|A0JNC3|INSI1_BOVIN;	Insulin-induced gene 1 protein OS=Bos taurus OX=9913 GN=INSIG1 PE=2 SV=1;	PF07281.9	INSIG	Insulin-induced protein
ENSSSCG00000003610	IQCC	IQ motif containing C [Source:NCBI gene;Acc:100518737]	0.405	-1.30258	4.52993e-11	4.10328e-09	yes	down	4.21	1.64667	GO:000551	MF:protein binding;	ENOG410ZCCY	O:Posttranslational modification, protein turnover, chaperones	XP_003127804.1	IQ domain-containing protein C isoform X1 [Sus scrofa]	sp|Q2TBI7|IQCC_BOVIN;	IQ domain-containing protein C OS=Bos taurus OX=9913 GN=IQCC PE=2 SV=1;	PF00612.24	IQ	IQ calmodulin-binding motif
ENSSSCG00000040100	ITPKB	inositol-trisphosphate 3-kinase B [Source:NCBI gene;Acc:102164283]	0.47	-1.08825	3.35365e-09	2.23928e-07	yes	down	2.81667	1.27667	GO:0046638;GO:0016310;GO:0046579;GO:0007166;GO:0045059;GO:0002262;GO:0000165;GO:0035726;GO:0033030;GO:0030217;GO:0071277;GO:0032957;GO:0032958;GO:0045061;GO:0045638;GO:0001932;GO:0016020;GO:0005829;GO:0005634;GO:0008440;GO:0016740;GO:001630	BP:positive regulation of alpha-beta T cell differentiation;BP:phosphorylation;BP:positive regulation of Ras protein signal transduction;BP:cell surface receptor signaling pathway;BP:positive thymic T cell selection;BP:myeloid cell homeostasis;BP:MAPK cascade;BP:common myeloid progenitor cell proliferation;BP:negative regulation of neutrophil apoptotic process;BP:T cell differentiation;BP:cellula…	ENOG410Y8AC	S:Function unknown	XP_020920073.1	LOW QUALITY PROTEIN: inositol-trisphosphate 3-kinase B [Sus scrofa]	sp|P27987|IP3KB_HUMAN;	Inositol-trisphosphate 3-kinase B OS=Homo sapiens OX=9606 GN=ITPKB PE=1 SV=5;	PF03770.13	IPK	Inositol polyphosphate kinase
ENSSSCG00000013735	JUNB	JunB proto-oncogene, AP-1 transcription factor subunit [Source:NCBI gene;Acc:100523358]	4.877	2.28597	3.04677e-38	8.27941e-36	yes	up	16.8333	79.5	GO:0009314;GO:0060716;GO:0032496;GO:0010941;GO:0060136;GO:0001649;GO:0034097;GO:0009653;GO:0001829;GO:0000122;GO:0033687;GO:0001568;GO:0009612;GO:0046697;GO:0042127;GO:0030316;GO:0048609;GO:0009987;GO:0071277;GO:0045597;GO:0051591;GO:0010033;GO:0001890;GO:0001570;GO:0051726;GO:0007565;GO:0042493;GO:0032870;GO:0006355;GO:0006357;GO:0045944;GO:0001701;GO:0035976;GO:0005654;GO:0005634;GO:0000790;GO:…	BP:response to radiation;BP:labyrinthine layer blood vessel development;BP:response to lipopolysaccharide;BP:regulation of cell death;BP:embryonic process involved in female pregnancy;BP:osteoblast differentiation;BP:response to cytokine;BP:anatomical structure morphogenesis;BP:trophectodermal cell differentiation;BP:negative regulation of transcription from RNA polymerase II promoter;BP:osteobla…	ENOG410XRWH	K:Transcription	XP_005674540.1	transcription factor jun-B [Sus scrofa]	sp|Q0VBZ5|JUNB_BOVIN;	Transcription factor jun-B OS=Bos taurus OX=9913 GN=JUNB PE=2 SV=1;	PF03957.10;PF00170.18;PF07716.12;PF03131.14	Jun;bZIP_1;bZIP_2;bZIP_Maf	Jun-like transcription factor;bZIP transcription factor;Basic region leucine zipper;bZIP Maf transcription factor
ENSSSCG00000037413	KBTBD7	kelch repeat and BTB domain containing 7 [Source:NCBI gene;Acc:100511833]	0.376	-1.41205	8.4396e-08	4.40253e-06	yes	down	0.99	0.36	GO:000551	MF:protein binding;	ENOG4110S2H	S:Function unknown	XP_003131043.2	LOW QUALITY PROTEIN: kelch repeat and BTB domain-containing protein 7 [Sus scrofa]	sp|Q8WVZ9|KBTB7_HUMAN;	Kelch repeat and BTB domain-containing protein 7 OS=Homo sapiens OX=9606 GN=KBTBD7 PE=1 SV=1;	PF00651.28;PF07707.12;PF01344.22;PF13964.3;PF13415.3;PF13418.3	BTB;BACK;Kelch_1;Kelch_6;Kelch_3;Kelch_4	BTB/POZ domain;BTB And C-terminal Kelch;Kelch motif;Kelch motif;Galactose oxidase, central domain;Galactose oxidase, central domain
ENSSSCG00000026297	KLB	klotho beta [Source:NCBI gene;Acc:100525825]	4.107	2.03805	1.2852e-08	7.82165e-07	yes	up	0.13	0.513333	GO:0008284;GO:0005975;GO:0090080;GO:0008543;GO:0016021;GO:0016020;GO:0017134;GO:0004553;GO:000510	BP:positive regulation of cell proliferation;BP:carbohydrate metabolic process;BP:positive regulation of MAPKKK cascade by fibroblast growth factor receptor signaling pathway;BP:fibroblast growth factor receptor signaling pathway;CC:integral component of membrane;CC:membrane;MF:fibroblast growth factor binding;MF:hydrolase activity, hydrolyzing O-glycosyl compounds;MF:fibroblast growth factor rec…	COG2723	S:Function unknown	XP_003482415.3	beta-klotho isoform X1 [Sus scrofa]	sp|Q86Z14|KLOTB_HUMAN;	Beta-klotho OS=Homo sapiens OX=9606 GN=KLB PE=1 SV=1;	PF00232.15	Glyco_hydro_1	Glycosyl hydrolase family 1
ENSSSCG00000004711	LCMT2	leucine carboxyl methyltransferase 2 [Source:NCBI gene;Acc:100156590]	0.38	-1.3969	7.40823e-11	6.55796e-09	yes	down	4.72667	1.74333	GO:0030488;GO:0006481;GO:0031591;GO:0032259;GO:0005829;GO:0018423;GO:0008757;GO:0005515;GO:0008175;GO:000816	BP:tRNA methylation;BP:C-terminal protein methylation;BP:wybutosine biosynthetic process;BP:methylation;CC:cytosol;MF:protein C-terminal leucine carboxyl O-methyltransferase activity;MF:S-adenosylmethionine-dependent methyltransferase activity;MF:protein binding;MF:tRNA methyltransferase activity;MF:methyltransferase activity;	ENOG410YB9K	F:Nucleotide transport and metabolism	XP_003353428.1	tRNA wybutosine-synthesizing protein 4 [Sus scrofa]	sp|O60294|TYW4_HUMAN;	tRNA wybutosine-synthesizing protein 4 OS=Homo sapiens OX=9606 GN=LCMT2 PE=1 SV=3;	PF04072.11;PF13964.3;PF13418.3;PF13415.3	LCM;Kelch_6;Kelch_4;Kelch_3	Leucine carboxyl methyltransferase;Kelch motif;Galactose oxidase, central domain;Galactose oxidase, central domain
ENSSSCG00000040961	LIF	LIF, interleukin 6 family cytokine [Source:NCBI gene;Acc:399503]	3.139	1.65028	1.5662e-08	9.28987e-07	yes	up	0.43	1.3	GO:0048666;GO:0030324;GO:0048711;GO:0006955;GO:0042531;GO:0010628;GO:0060135;GO:0033141;GO:0048861;GO:0048863;GO:0042511;GO:0042517;GO:0010469;GO:0045835;GO:0007260;GO:0048644;GO:0060463;GO:0008284;GO:0008285;GO:0060426;GO:0060708;GO:0060707;GO:0043410;GO:0045595;GO:0072307;GO:0046888;GO:0033138;GO:1903025;GO:0019827;GO:1900182;GO:0050731;GO:0045651;GO:0072108;GO:1901676;GO:0001974;GO:0045944;GO:…	BP:neuron development;BP:lung development;BP:positive regulation of astrocyte differentiation;BP:immune response;BP:positive regulation of tyrosine phosphorylation of STAT protein;BP:positive regulation of gene expression;BP:maternal process involved in female pregnancy;BP:positive regulation of peptidyl-serine phosphorylation of STAT protein;BP:leukemia inhibitory factor signaling pathway;BP:ste…	ENOG410YVPP	K:Transcription	XP_019498588.1	PREDICTED: leukemia inhibitory factor, partial [Hipposideros armiger]	sp|O62728|LIF_NEOVI;	Leukemia inhibitory factor OS=Neovison vison OX=452646 GN=LIF PE=2 SV=1;	PF01291.14	LIF_OSM	LIF / OSM family
ENSSSCG00000034715	LIPT1	lipoyltransferase 1 [Source:NCBI gene;Acc:100622302]	0.43	-1.21673	1.88574e-06	7.32054e-05	yes	down	6.19	2.56333	GO:0009249;GO:0006629;GO:0006464;GO:0046487;GO:0005739;GO:0005759;GO:001674	BP:protein lipoylation;BP:lipid metabolic process;BP:cellular protein modification process;BP:glyoxylate metabolic process;CC:mitochondrion;CC:mitochondrial matrix;MF:transferase activity, transferring acyl groups;	COG0095	H:Coenzyme transport and metabolism	XP_003362135.4	lipoyltransferase 1, mitochondrial [Sus scrofa]	sp|Q9Y234|LIPT_HUMAN;	Lipoyltransferase 1, mitochondrial OS=Homo sapiens OX=9606 GN=LIPT1 PE=1 SV=1;	PF03099.16	BPL_LplA_LipB	Biotin/lipoate A/B protein ligase family
ENSSSCG00000030165	MAFF	MAF bZIP transcription factor F [Source:NCBI gene;Acc:100156484]	2.816	1.49369	9.21155e-42	2.90911e-39	yes	up	9.69	26.4233	GO:0001701;GO:0045604;GO:0006355;GO:0045944;GO:0035914;GO:0005634;GO:0005739;GO:0043565;GO:0003700;GO:0003677;GO:000097	BP:in utero embryonic development;BP:regulation of epidermal cell differentiation;BP:regulation of transcription, DNA-templated;BP:positive regulation of transcription from RNA polymerase II promoter;BP:skeletal muscle cell differentiation;CC:nucleus;CC:mitochondrion;MF:sequence-specific DNA binding;MF:transcription factor activity, sequence-specific DNA binding;MF:DNA binding;MF:RNA polymerase I…	ENOG41102C7	S:Function unknown	XP_013843663.1	transcription factor MafF isoform X1 [Sus scrofa]	sp|Q9ULX9|MAFF_HUMAN;	Transcription factor MafF OS=Homo sapiens OX=9606 GN=MAFF PE=1 SV=2;	PF03131.14;PF00170.18	bZIP_Maf;bZIP_1	bZIP Maf transcription factor;bZIP transcription factor
ENSSSCG00000000275	MAP3K12	mitogen-activated protein kinase kinase kinase 12 [Source:NCBI gene;Acc:100517714]	2.111	1.0782	2.55124e-06	9.52437e-05	yes	up	0.576667	1.15667	GO:0000186;GO:0018105;GO:0018107;GO:0016310;GO:0046777;GO:0016572;GO:0007256;GO:0007257;GO:0007254;GO:0000165;GO:0006468;GO:0045893;GO:2000672;GO:0070374;GO:0030426;GO:0030424;GO:0005886;GO:0005829;GO:0000166;GO:0004674;GO:0016740;GO:0004672;GO:0005524;GO:0042803;GO:0016301;GO:0019901;GO:0004706;GO:000470	BP:activation of MAPKK activity;BP:peptidyl-serine phosphorylation;BP:peptidyl-threonine phosphorylation;BP:phosphorylation;BP:protein autophosphorylation;BP:histone phosphorylation;BP:activation of JNKK activity;BP:activation of JUN kinase activity;BP:JNK cascade;BP:MAPK cascade;BP:protein phosphorylation;BP:positive regulation of transcription, DNA-templated;BP:negative regulation of motor neur…	ENOG410YKX2	S:Function unknown	XP_003126240.1	mitogen-activated protein kinase kinase kinase 12 isoform X1 [Sus scrofa]	sp|Q60700|M3K12_MOUSE;	Mitogen-activated protein kinase kinase kinase 12 OS=Mus musculus OX=10090 GN=Map3k12 PE=1 SV=1;	PF07714.14;PF00069.22	Pkinase_Tyr;Pkinase	Protein tyrosine kinase;Protein kinase domain
ENSSSCG00000035933	MAPK15	mitogen-activated protein kinase 15 [Source:NCBI gene;Acc:110260411]	3.051	1.60913	1.80442e-05	0.000502016	yes	up	1.10333	3.17667	GO:0016310;GO:1904491;GO:0046777;GO:0007029;GO:0032212;GO:0090494;GO:1902017;GO:0010506;GO:0051973;GO:0008284;GO:0030336;GO:0006468;GO:1904355;GO:1905188;GO:0006974;GO:0000165;GO:0003400;GO:0005794;GO:0005737;GO:0036064;GO:0072687;GO:0005634;GO:0005776;GO:0005814;GO:0005911;GO:0000166;GO:1905832;GO:0004674;GO:0016740;GO:0004672;GO:0005524;GO:0016301;GO:0004707;GO:000368	BP:phosphorylation;BP:protein localization to ciliary transition zone;BP:protein autophosphorylation;BP:endoplasmic reticulum organization;BP:positive regulation of telomere maintenance via telomerase;BP:dopamine uptake;BP:regulation of cilium assembly;BP:regulation of autophagy;BP:positive regulation of telomerase activity;BP:positive regulation of cell proliferation;BP:negative regulation of ce…	ENOG410XNY0	S:Function unknown	XP_020946128.1	mitogen-activated protein kinase 15 isoform X3 [Sus scrofa]	sp|Q9Z2A6|MK15_RAT;	Mitogen-activated protein kinase 15 OS=Rattus norvegicus OX=10116 GN=Mapk15 PE=1 SV=2;	PF00069.22;PF07714.14	Pkinase;Pkinase_Tyr	Protein kinase domain;Protein tyrosine kinase
ENSSSCG00000003410	MASP2	mannan binding lectin serine peptidase 2 [Source:NCBI gene;Acc:100302537]	0.278	-1.84477	2.06235e-05	0.000560432	yes	down	0.663333	0.176667	GO:0006956;GO:0001867;GO:0006508;GO:0070062;GO:0005576;GO:0004252;GO:0048306;GO:0016787;GO:0030246;GO:0005509;GO:0008233;GO:000185	BP:complement activation;BP:complement activation, lectin pathway;BP:proteolysis;CC:extracellular exosome;CC:extracellular region;MF:serine-type endopeptidase activity;MF:calcium-dependent protein binding;MF:hydrolase activity;MF:carbohydrate binding;MF:calcium ion binding;MF:peptidase activity;MF:complement component C4b binding;	COG5640	L:Replication, recombination and repair	NP_001157120.1	mannan-binding lectin serine protease 2 precursor [Sus scrofa]	sp|O00187|MASP2_HUMAN;	Mannan-binding lectin serine protease 2 OS=Homo sapiens OX=9606 GN=MASP2 PE=1 SV=4;	PF00089.23;PF00431.17;PF00084.17;PF07645.12;PF14670.3	Trypsin;CUB;Sushi;EGF_CA;FXa_inhibition	Trypsin;CUB domain;Sushi repeat;Calcium-binding EGF domain;Coagulation Factor Xa inhibitory site
ENSSSCG00000030278	MLLT11	myeloid/lymphoid or mixed-lineage leukemia; translocated to, 11 [Source:NCBI gene;Acc:100520242]	2.37	1.24512	8.9763e-25	1.54247e-22	yes	up	5.12667	11.7267	GO:0090200;GO:0097190;GO:0097191;GO:0097193;GO:0043065;GO:0051901;GO:0045893;GO:0005737;GO:0005654;GO:000582	BP:positive regulation of release of cytochrome c from mitochondria;BP:apoptotic signaling pathway;BP:extrinsic apoptotic signaling pathway;BP:intrinsic apoptotic signaling pathway;BP:positive regulation of apoptotic process;BP:positive regulation of mitochondrial depolarization;BP:positive regulation of transcription, DNA-templated;CC:cytoplasm;CC:nucleoplasm;CC:cytosol;	ENOG4112CHF	K:Transcription	XP_013852618.1	CDC42 small effector protein 1 isoform X1 [Sus scrofa]	sp|Q5R4W2|AF1Q_PONAB;	Protein AF1q OS=Pongo abelii OX=9601 GN=MLLT11 PE=3 SV=1;	PF15017.3	WRNPLPNID	Putative WW-binding domain and destruction box
ENSSSCG00000018084	ND3	NADH dehydrogenase subunit 3 [Source:NCBI gene;Acc:808508]	0.472	-1.08434	9.51979e-42	2.92733e-39	yes	down	4833.34	2162.99	GO:0055114;GO:0016021;GO:0016020;GO:0005739;GO:0031966;GO:0005747;GO:0070469;GO:0030964;GO:000813	BP:oxidation-reduction process;CC:integral component of membrane;CC:membrane;CC:mitochondrion;CC:mitochondrial membrane;CC:mitochondrial respiratory chain complex I;CC:respiratory chain;CC:NADH dehydrogenase complex;MF:NADH dehydrogenas;	COG0838	C:Energy production and conversion	ATD85514.1	NADH dehydrogenase subunit 3 (mitochondrion) [Sus scrofa]	sp|O79880|NU3M_PIG;	NADH-ubiquinone oxidoreductase chain 3 OS=Sus scrofa OX=9823 GN=MT-ND3 PE=1 SV=1;	PF00507.16	Oxidored_q4	NADH-ubiquinone/plastoquinone oxidoreductase, chain 3
ENSSSCG00000018086	ND4L	NADH dehydrogenase subunit 4L [Source:NCBI gene;Acc:808509]	0.406	-1.30041	6.74066e-51	2.46139e-48	yes	down	7934.77	3042.36	GO:0042773;GO:0055114;GO:0030964;GO:0016021;GO:0016020;GO:0005739;GO:0031966;GO:0070469;GO:0005747;GO:0008137;GO:001665	BP:ATP synthesis coupled electron transport;BP:oxidation-reduction process;CC:NADH dehydrogenase complex;CC:integral component of membrane;CC:membrane;CC:mitochondrion;CC:mitochondrial membrane;CC:respiratory chain;CC:mitochondrial respiratory chain complex I;MF:NADH dehydrogenas;MF:oxidoreductase activity, acting on NA;	COG0713	C:Energy production and conversion	ARN58911.1	NADH dehydrogenase subunit 4L (mitochondrion) [Platygonus compressus]	sp|P56632|NU4LM_PIG;	NADH-ubiquinone oxidoreductase chain 4L OS=Sus scrofa OX=9823 GN=MT-ND4L PE=1 SV=1;	PF00420.21	Oxidored_q2	NADH-ubiquinone/plastoquinone oxidoreductase chain 4L
ENSSSCG00000018091	ND5	NADH dehydrogenase subunit 5 [Source:NCBI gene;Acc:808511]	0.318	-1.65246	9.01588e-124	1.05351e-120	yes	down	4343.56	1335.58	GO:0042773;GO:0055114;GO:0016021;GO:0016020;GO:0005739;GO:0005743;GO:0005747;GO:0070469;GO:0008137;GO:000395	BP:ATP synthesis coupled electron transport;BP:oxidation-reduction process;CC:integral component of membrane;CC:membrane;CC:mitochondrion;CC:mitochondrial inner membrane;CC:mitochondrial respiratory chain complex I;CC:respiratory chain;MF:NADH dehydrogenas;MF:NADH dehydrogenase activity;	COG1009	C:Energy production and conversion	AEO92943.1	NADH dehydrogenase subunit 5 (mitochondrion) [Sus scrofa]	sp|Q9TDR1|NU5M_PIG;	NADH-ubiquinone oxidoreductase chain 5 OS=Sus scrofa OX=9823 GN=MT-ND5 PE=1 SV=1;	PF00361.17;PF06455.8;PF00662.17	Proton_antipo_M;NADH5_C;Proton_antipo_N	Proton-conducting membrane transporter;NADH dehydrogenase subunit 5 C-terminus;NADH-Ubiquinone oxidoreductase
ENSSSCG00000018092	ND6	NADH dehydrogenase subunit 6 [Source:NCBI gene;Acc:808512]	0.409	-1.29036	9.32571e-55	4.03596e-52	yes	down	3621.02	1517.98	GO:0055114;GO:0016021;GO:0016020;GO:0005739;GO:0031966;GO:0070469;GO:000813	BP:oxidation-reduction process;CC:integral component of membrane;CC:membrane;CC:mitochondrion;CC:mitochondrial membrane;CC:respiratory chain;MF:NADH dehydrogenas;	ENOG410YP23	C:Energy production and conversion	AOS86906.1	NADH dehydrogenase subunit 6 (mitochondrion) [Sus scrofa]	sp|O79882|NU6M_PIG;	NADH-ubiquinone oxidoreductase chain 6 OS=Sus scrofa OX=9823 GN=MT-ND6 PE=1 SV=1;	PF00499.17	Oxidored_q3	NADH-ubiquinone/plastoquinone oxidoreductase chain 6
ENSSSCG00000001952	NFKBIA	NFKB inhibitor alpha [Source:NCBI gene;Acc:406188]	6.255	2.64505	4.73026e-91	3.94807e-88	yes	up	5.80333	35.02	GO:0033209;GO:0032495;GO:0032496;GO:0035994;GO:0050729;GO:0007253;GO:0071356;GO:0070431;GO:0000060;GO:0045746;GO:0032270;GO:0010745;GO:0010468;GO:0042127;GO:0006606;GO:0045893;GO:0034142;GO:0042994;GO:0010875;GO:0070427;GO:0031663;GO:0007249;GO:0032088;GO:0045638;GO:0045944;GO:0043330;GO:0010888;GO:0005634;GO:0005737;GO:0005886;GO:0005829;GO:0019899;GO:0042802;GO:0008139;GO:0051059;GO:0031625;GO:…	BP:tumor necrosis factor-mediated signaling pathway;BP:response to muramyl dipeptide;BP:response to lipopolysaccharide;BP:response to muscle stretch;BP:positive regulation of inflammatory response;BP:cytoplasmic sequestering of NF-kappaB;BP:cellular response to tumor necrosis factor;BP:nucleotide-binding oligomerization domain containing 2 signaling pathway;BP:protein import into nucleus, translo…	COG0666	S:Function unknown	NP_001005150.1	NF-kappa-B inhibitor alpha [Sus scrofa]	sp|Q08353|IKBA_PIG;	NF-kappa-B inhibitor alpha OS=Sus scrofa OX=9823 GN=NFKBIA PE=2 SV=1;	PF12796.4;PF00023.27;PF13606.3;PF13857.3;PF13637.3	Ank_2;Ank;Ank_3;Ank_5;Ank_4	Ankyrin repeats;Ankyrin repeat;Ankyrin repeat;Ankyrin repeats;Ankyrin repeats
ENSSSCG00000011951	NFKBIZ	NFKB inhibitor zeta [Source:NCBI gene;Acc:100520981]	2.742	1.45535	1.59469e-19	2.24505e-17	yes	up	2.36667	5.80333	GO:0050852;GO:0050729;GO:2000321;GO:0006954;GO:0016607;GO:0005634;GO:0036464;GO:000551	BP:T cell receptor signaling pathway;BP:positive regulation of inflammatory response;BP:positive regulation of T-helper 17 cell differentiation;BP:inflammatory response;CC:nuclear speck;CC:nucleus;CC:cytoplasmic ribonucleoprotein granule;MF:protein binding;	COG0666	U:Intracellular trafficking, secretion, and vesicular transport	NP_001302528.1	NF-kappa-B inhibitor zeta [Sus scrofa]	sp|Q9BE45|IKBZ_BOVIN;	NF-kappa-B inhibitor zeta OS=Bos taurus OX=9913 GN=NFKBIZ PE=2 SV=2;	PF12796.4;PF00023.27;PF13637.3;PF13857.3	Ank_2;Ank;Ank_4;Ank_5	Ankyrin repeats;Ankyrin repeat;Ankyrin repeats;Ankyrin repeats
ENSSSCG00000003431	NPPB	natriuretic peptide B [Source:NCBI gene;Acc:396844]	4.907	2.29485	6.83576e-07	2.98044e-05	yes	up	2.07333	8.58667	GO:0007218;GO:0050880;GO:0019934;GO:0007168;GO:0010469;GO:0003085;GO:0006182;GO:0043234;GO:0005615;GO:0005634;GO:0005737;GO:0005576;GO:0005179;GO:005142	BP:neuropeptide signaling pathway;BP:regulation of blood vessel size;BP:cGMP-mediated signaling;BP:receptor guanylyl cyclase signaling pathway;BP:regulation of receptor activity;BP:negative regulation of systemic arterial blood pressure;BP:cGMP biosynthetic process;CC:protein complex;CC:extracellular space;CC:nucleus;CC:cytoplasm;CC:extracellular region;MF:hormone activity;MF:hormone receptor bin…	ENOG410ZE1B	O:Posttranslational modification, protein turnover, chaperones	P07634.2;;;;;;	;Flags: Precursor	sp|P07634|ANFB_PIG;	Natriuretic peptides B OS=Sus scrofa OX=9823 GN=NPPB PE=1 SV=2;	PF00212.15	ANP	Atrial natriuretic peptide
ENSSSCG00000031321	NR4A1	nuclear receptor subfamily 4 group A member 1 [Source:HGNC Symbol;Acc:HGNC:7980]	25.13	4.65132	0	0	yes	up	2.48	54.9267	GO:0030522;GO:0006355;GO:0043401;GO:0005634;GO:0043565;GO:0003700;GO:0003707;GO:0008270;GO:0003677;GO:0046872;GO:000487	BP:intracellular receptor signaling pathway;BP:regulation of transcription, DNA-templated;BP:steroid hormone mediated signaling pathway;CC:nucleus;MF:sequence-specific DNA binding;MF:transcription factor activity, sequence-specific DNA binding;MF:steroid hormone receptor activity;MF:zinc ion binding;MF:DNA binding;MF:metal ion binding;MF:RNA polymerase II transcription factor activity, ligand-act…	ENOG410YWNC	U:Intracellular trafficking, secretion, and vesicular transport	XP_019580080.1	PREDICTED: nuclear receptor subfamily 4 group A member 1 isoform X1 [Rhinolophus sinicus]	sp|Q0V8F0|NR4A1_BOVIN;	Nuclear receptor subfamily 4 group A member 1 OS=Bos taurus OX=9913 GN=NR4A1 PE=2 SV=1;	PF00104.27;PF00105.15	Hormone_recep;zf-C4	Ligand-binding domain of nuclear hormone receptor;Zinc finger, C4 type
ENSSSCG00000015871	NR4A2	nuclear receptor subfamily 4 group A member 2 [Source:NCBI gene;Acc:100157120]	17.952	4.16611	2.51898e-178	4.2049e-175	yes	up	1.57333	16.8167	GO:2001234;GO:0042053;GO:0009791;GO:0001764;GO:0043401;GO:0045444;GO:0001666;GO:0021986;GO:0030522;GO:0071376;GO:0000122;GO:0043576;GO:0010467;GO:0043085;GO:0010468;GO:0021953;GO:0021952;GO:0030182;GO:0051866;GO:0042417;GO:0042416;GO:0045893;GO:0034599;GO:0008344;GO:0031668;GO:0007399;GO:0071542;GO:0042551;GO:0001975;GO:0006355;GO:0045944;GO:0006351;GO:0043524;GO:0016607;GO:0005634;GO:0008270;GO:…	BP:negative regulation of apoptotic signaling pathway;BP:regulation of dopamine metabolic process;BP:post-embryonic development;BP:neuron migration;BP:steroid hormone mediated signaling pathway;BP:fat cell differentiation;BP:response to hypoxia;BP:habenula development;BP:intracellular receptor signaling pathway;BP:cellular response to corticotropin-releasing hormone stimulus;BP:negative regulatio…	ENOG410YWNC	J:Translation, ribosomal structure and biogenesis	XP_005657586.1	nuclear receptor subfamily 4 group A member 2 isoform X1 [Sus scrofa]	sp|P43354|NR4A2_HUMAN;	Nuclear receptor subfamily 4 group A member 2 OS=Homo sapiens OX=9606 GN=NR4A2 PE=1 SV=1;	PF00105.15;PF00104.27	zf-C4;Hormone_recep	Zinc finger, C4 type;Ligand-binding domain of nuclear hormone receptor
ENSSSCG00000005385	NR4A3	nuclear receptor subfamily 4 group A member 3 [Source:NCBI gene;Acc:397479]	24.002	4.58506	1.35704e-10	1.14079e-08	yes	up	0.0266667	0.53	GO:0030522;GO:0071376;GO:0006355;GO:0043401;GO:0005667;GO:0005634;GO:0042629;GO:0043565;GO:0035259;GO:0003700;GO:0003707;GO:0008270;GO:0003677;GO:0000978;GO:0046872;GO:0004879;GO:000097	BP:intracellular receptor signaling pathway;BP:cellular response to corticotropin-releasing hormone stimulus;BP:regulation of transcription, DNA-templated;BP:steroid hormone mediated signaling pathway;CC:transcription factor complex;CC:nucleus;CC:mast cell granule;MF:sequence-specific DNA binding;MF:glucocorticoid receptor binding;MF:transcription factor activity, sequence-specific DNA binding;MF…	ENOG410YWNC	K:Transcription	NP_999412.1	nuclear receptor subfamily 4 group A member 3 [Sus scrofa]	sp|Q92570|NR4A3_HUMAN;	Nuclear receptor subfamily 4 group A member 3 OS=Homo sapiens OX=9606 GN=NR4A3 PE=1 SV=3;	PF00105.15;PF00104.27	zf-C4;Hormone_recep	Zinc finger, C4 type;Ligand-binding domain of nuclear hormone receptor
ENSSSCG00000038471	NUAK2	NUAK family kinase 2 [Source:NCBI gene;Acc:100625699]	2.537	1.34298	5.85932e-08	3.12631e-06	yes	up	1.36667	3.36333	GO:0006468;GO:0030036;GO:0043066;GO:0042149;GO:0016607;GO:0000287;GO:0004674;GO:0004672;GO:000552	BP:protein phosphorylation;BP:actin cytoskeleton organization;BP:negative regulation of apoptotic process;BP:cellular response to glucose starvation;CC:nuclear speck;MF:magnesium ion binding;MF:protein serine/threonine kinase activity;MF:protein kinase activity;MF:ATP binding;	ENOG410XPDM	T:Signal transduction mechanisms	XP_003357439.2	LOW QUALITY PROTEIN: NUAK family SNF1-like kinase 2 [Sus scrofa]	sp|Q5R7G9|NUAK2_PONAB;	NUAK family SNF1-like kinase 2 OS=Pongo abelii OX=9601 GN=NUAK2 PE=2 SV=1;	PF00069.22;PF07714.14;PF14531.3;PF06293.11;PF01163.19	Pkinase;Pkinase_Tyr;Kinase-like;Kdo;RIO1	Protein kinase domain;Protein tyrosine kinase;Kinase-like;Lipopolysaccharide kinase;RIO1 family
ENSSSCG00000037564	OTX1	orthodenticle homeobox 1 [Source:NCBI gene;Acc:100520485]	0.395	-1.34158	2.66084e-08	1.5392e-06	yes	down	2.30333	0.873333	GO:0042472;GO:0009952;GO:0006357;GO:0022037;GO:0048852;GO:0006355;GO:0045944;GO:0030901;GO:0030900;GO:0007275;GO:0005634;GO:0043565;GO:0003700;GO:0001228;GO:0001077;GO:0003677;GO:000097	BP:inner ear morphogenesis;BP:anterior/posterior pattern specification;BP:regulation of transcription from RNA polymerase II promoter;BP:metencephalon development;BP:diencephalon morphogenesis;BP:regulation of transcription, DNA-templated;BP:positive regulation of transcription from RNA polymerase II promoter;BP:midbrain development;BP:forebrain development;BP:multicellular organism development;C…	ENOG4111XIJ	K:Transcription	XP_023474791.1	homeobox protein OTX1 isoform X1 [Equus caballus]	sp|P32242|OTX1_HUMAN;	Homeobox protein OTX1 OS=Homo sapiens OX=9606 GN=OTX1 PE=1 SV=1;	PF03529.10;PF00046.26	TF_Otx;Homeobox	Otx1 transcription factor;Homeobox domain
ENSSSCG00000016810	PDZD2	PDZ domain containing 2 [Source:NCBI gene;Acc:100525132]	0.482	-1.05367	0.00550763	0.0484979	yes	down	0.273333	0.126667	GO:0005737;GO:000551	CC:cytoplasm;MF:protein binding;	ENOG4110362;ENOG4111F58	O:Posttranslational modification, protein turnover, chaperones;	XP_019838327.1	PREDICTED: PDZ domain-containing protein 2 isoform X2 [Bos indicus]	sp|O15018|PDZD2_HUMAN;	PDZ domain-containing protein 2 OS=Homo sapiens OX=9606 GN=PDZD2 PE=1 SV=4;	PF00595.21;PF13180.3	PDZ;PDZ_2	PDZ domain;PDZ domain
ENSSSCG00000011133	PFKFB3	6-phosphofructo-2-kinase/fructose-2,6-biphosphatase 3 [Source:NCBI gene;Acc:100516289]	2.992	1.5812	2.93696e-23	4.76644e-21	yes	up	4.63667	12.04	GO:0046835;GO:0006000;GO:0006003;GO:0003824;GO:0003873;GO:000552	BP:carbohydrate phosphorylation;BP:fructose metabolic process;BP:fructose 2,6-bisphosphate metabolic process;MF:catalytic activity;MF:6-phosphofructo-2-kinase activity;MF:ATP binding;	COG0406	T:Signal transduction mechanisms	XP_013835772.2	6-phosphofructo-2-kinase/fructose-2,6-bisphosphatase 3 isoform X2 [Sus scrofa]	sp|Q16875|F263_HUMAN;	6-phosphofructo-2-kinase/fructose-2,6-bisphosphatase 3 OS=Homo sapiens OX=9606 GN=PFKFB3 PE=1 SV=1;	PF01591.15;PF00300.19;PF13671.3;PF08433.7	6PF2K;His_Phos_1;AAA_33;KTI12	6-phosphofructo-2-kinase;Histidine phosphatase superfamily;AAA domain;Chromatin associated protein KTI12
ENSSSCG00000021597	PHLDA2	pleckstrin homology like domain family A member 2 [Source:NCBI gene;Acc:100379631]	2.809	1.49016	2.71584e-100	2.44112e-97	yes	up	457.66	1239.61	GO:0009887;GO:0030334;GO:1903547;GO:0060721;GO:0045995;GO:0070873;GO:0010468;GO:000189	BP:animal organ morphogenesis;BP:regulation of cell migration;BP:regulation of growth hormone activity;BP:regulation of spongiotrophoblast cell proliferation;BP:regulation of embryonic development;BP:regulation of glycogen metabolic process;BP:regulation of gene expression;BP:placenta development;	ENOG4111IXF	O:Posttranslational modification, protein turnover, chaperones	NP_001167528.1	pleckstrin homology-like domain family A member 2 [Sus scrofa]	sp|Q0VC85|PHLA2_BOVIN;	Pleckstrin homology-like domain family A member 2 OS=Bos taurus OX=9913 GN=PHLDA2 PE=2 SV=1;	------	------	------
ENSSSCG00000010312	PLAU	plasminogen activator, urokinase [Source:NCBI gene;Acc:396985]	2.002	1.00165	8.1232e-18	1.1167e-15	yes	up	1060.92	2055.22	GO:0016310;GO:0001666;GO:0031639;GO:0033628;GO:0014910;GO:0006508;GO:0010469;GO:0042127;GO:0030335;GO:0014909;GO:2000097;GO:0042730;GO:0005925;GO:0005615;GO:0009986;GO:0070062;GO:0005576;GO:0004252;GO:0008233;GO:0008236;GO:0016787;GO:001630	BP:phosphorylation;BP:response to hypoxia;BP:plasminogen activation;BP:regulation of cell adhesion mediated by integrin;BP:regulation of smooth muscle cell migration;BP:proteolysis;BP:regulation of receptor activity;BP:regulation of cell proliferation;BP:positive regulation of cell migration;BP:smooth muscle cell migration;BP:regulation of smooth muscle cell-matrix adhesion;BP:fibrinolysis;CC:foc…	COG5640	O:Posttranslational modification, protein turnover, chaperones	P04185.1;;;;;;	;Flags: Precursor	sp|P04185|UROK_PIG;	Urokinase-type plasminogen activator OS=Sus scrofa OX=9823 GN=PLAU PE=2 SV=1;	PF00089.23;PF00051.15;PF13365.3	Trypsin;Kringle;Trypsin_2	Trypsin;Kringle domain;Trypsin-like peptidase domain
ENSSSCG00000032434	PLAUR	plasminogen activator, urokinase receptor [Source:NCBI gene;Acc:100521017]	2.034	1.02409	9.87591e-52	3.72258e-49	yes	up	25.1667	52.1033	GO:0038195;GO:0090200;GO:0043066;GO:0030162;GO:0043388;GO:0045742;GO:0001934;GO:2001243;GO:2001268;GO:0009986;GO:0005887;GO:0005886;GO:0030377;GO:0019899;GO:0019904;GO:000510	BP:urokinase plasminogen activator signaling pathway;BP:positive regulation of release of cytochrome c from mitochondria;BP:negative regulation of apoptotic process;BP:regulation of proteolysis;BP:positive regulation of DNA binding;BP:positive regulation of epidermal growth factor receptor signaling pathway;BP:positive regulation of protein phosphorylation;BP:negative regulation of intrinsic apop…	ENOG410Z47S	O:Posttranslational modification, protein turnover, chaperones	XP_003127246.2	urokinase plasminogen activator surface receptor [Sus scrofa]	sp|Q05588|UPAR_BOVIN;	Urokinase plasminogen activator surface receptor OS=Bos taurus OX=9913 GN=PLAUR PE=2 SV=1;	PF00021.18	UPAR_LY6	u-PAR/Ly-6 domain
ENSSSCG00000003928	PLK3	polo like kinase 3 [Source:NCBI gene;Acc:397250]	2.696	1.43083	1.59261e-33	3.57878e-31	yes	up	8.38667	21.8533	GO:1904716;GO:0016310;GO:0000082;GO:0000302;GO:0044819;GO:0051302;GO:0000122;GO:0043066;GO:0009314;GO:0032465;GO:0006468;GO:0000278;GO:0090316;GO:0031122;GO:0006974;GO:0006970;GO:2000777;GO:0090166;GO:0000922;GO:0005737;GO:0005813;GO:0005634;GO:0005795;GO:0005730;GO:0004672;GO:0000166;GO:0004674;GO:0016740;GO:0005524;GO:0016301;GO:0005515;GO:000203	BP:positive regulation of chaperone-mediated autophagy;BP:phosphorylation;BP:G1/S transition of mitotic cell cycle;BP:response to reactive oxygen species;BP:mitotic G1/S transition checkpoint;BP:regulation of cell division;BP:negative regulation of transcription from RNA polymerase II promoter;BP:negative regulation of apoptotic process;BP:response to radiation;BP:regulation of cytokinesis;BP:pro…	ENOG410XQBP	S:Function unknown	XP_003128106.1	serine/threonine-protein kinase PLK3 [Sus scrofa]	sp|Q9H4B4|PLK3_HUMAN;	Serine/threonine-protein kinase PLK3 OS=Homo sapiens OX=9606 GN=PLK3 PE=1 SV=2;	PF00069.22;PF07714.14;PF00659.15;PF14531.3	Pkinase;Pkinase_Tyr;POLO_box;Kinase-like	Protein kinase domain;Protein tyrosine kinase;POLO box duplicated region;Kinase-like
ENSSSCG00000037432	PLPPR3	phospholipid phosphatase related 3 [Source:NCBI gene;Acc:100511492]	3.041	1.60453	7.59876e-38	1.97314e-35	yes	up	1.5	4.40667	GO:0016021;GO:001602	CC:integral component of membrane;CC:membrane;	ENOG410ZZ6F;COG0671;ENOG410XQ9P	S:Function unknown;I:Lipid transport and metabolism;S:Function unknown	XP_003354012.3	phospholipid phosphatase-related protein type 3 [Sus scrofa]	sp|Q6T4P5|PLPR3_HUMAN;	Phospholipid phosphatase-related protein type 3 OS=Homo sapiens OX=9606 GN=PLPPR3 PE=2 SV=1;	PF01569.18	PAP2	PAP2 superfamily
ENSSSCG00000004346	POU3F2	POU class 3 homeobox 2 [Source:HGNC Symbol;Acc:HGNC:9215]	0.114	-3.13874	5.20884e-07	2.34097e-05	yes	down	0.533333	0.06	GO:0048666;GO:0022011;GO:0010629;GO:0008544;GO:0021985;GO:0071310;GO:0021799;GO:0045944;GO:0021979;GO:0008284;GO:0048665;GO:0048663;GO:0030182;GO:0045595;GO:0014044;GO:0014002;GO:0050770;GO:0007420;GO:0007399;GO:0040018;GO:0006355;GO:0006357;GO:0021869;GO:0005634;GO:0005667;GO:0003677;GO:0043565;GO:0003713;GO:0003700;GO:0001228;GO:0042802;GO:000097	BP:neuron development;BP:myelination in peripheral nervous system;BP:negative regulation of gene expression;BP:epidermis development;BP:neurohypophysis development;BP:cellular response to organic substance;BP:cerebral cortex radially oriented cell migration;BP:positive regulation of transcription from RNA polymerase II promoter;BP:hypothalamus cell differentiation;BP:positive regulation of cell p…	ENOG410XQ7X	S:Function unknown	XP_008150268.1	PREDICTED: POU domain, class 3, transcription factor 2 [Eptesicus fuscus]	sp|P70030|P3F2B_XENLA;	POU domain, class 3, transcription factor 2-B OS=Xenopus laevis OX=8355 GN=pou3f2-b PE=2 SV=1;	PF00157.14;PF10846.5	Pou;DUF2722	Pou domain - N-terminal to homeobox domain;Protein of unknown function
ENSSSCG00000036768	PRAG1	PEAK1 related, kinase-activating pseudokinase 1 [Source:NCBI gene;Acc:100620852]	0.402	-1.31428	1.63096e-11	1.57502e-09	yes	down	2.09333	0.823333	GO:0006468;GO:0008593;GO:0016477;GO:0005925;GO:0005634;GO:0004672;GO:0005524;GO:004280	BP:protein phosphorylation;BP:regulation of Notch signaling pathway;BP:cell migration;CC:focal adhesion;CC:nucleus;MF:protein kinase activity;MF:ATP binding;MF:identical protein binding;	ENOG4110SRP	T:Signal transduction mechanisms	XP_005907445.1	PREDICTED: tyrosine-protein kinase SgK223 [Bos mutus]	sp|Q86YV5|PRAG1_HUMAN;	Tyrosine-protein kinase PRAG1 OS=Homo sapiens OX=9606 GN=PRAG1 PE=1 SV=4;	PF00069.22;PF07714.14	Pkinase;Pkinase_Tyr	Protein kinase domain;Protein tyrosine kinase
ENSSSCG00000015579	PTGS2	prostaglandin-endoperoxide synthase 2 [Source:NCBI gene;Acc:397590]	4.532	2.18011	2.35411e-115	2.50071e-112	yes	up	58.2	247.08	GO:0033138;GO:1902219;GO:0008217;GO:0150077;GO:0071471;GO:0098869;GO:0043066;GO:0071456;GO:0031394;GO:0042127;GO:0050873;GO:0071498;GO:0001516;GO:0006954;GO:0090336;GO:0006979;GO:0055114;GO:0031622;GO:0007566;GO:0043154;GO:0046697;GO:0019371;GO:0005783;GO:0005737;GO:0043005;GO:0019899;GO:0042803;GO:0020037;GO:0004666;GO:000460	BP:positive regulation of peptidyl-serine phosphorylation;BP:negative regulation of intrinsic apoptotic signaling pathway in response to osmotic stress;BP:regulation of blood pressure;BP:old GO;BP:cellular response to non-ionic osmotic stress;BP:cellular oxidant detoxification;BP:negative regulation of apoptotic process;BP:cellular response to hypoxia;BP:positive regulation of prostaglandin biosy…	ENOG410XPZ3	S:Function unknown	NP_999486.1	prostaglandin G/H synthase 2 precursor [Sus scrofa]	sp|O62698|PGH2_BOVIN;	Prostaglandin G/H synthase 2 OS=Bos taurus OX=9913 GN=PTGS2 PE=2 SV=2;	PF03098.12;PF00008.24	An_peroxidase;EGF	Animal haem peroxidase;EGF-like domain
ENSSSCG00000012050	RCAN1	regulator of calcineurin 1 [Source:NCBI gene;Acc:100511902]	8.49	3.0857	9.62733e-162	1.40619e-158	yes	up	4.76	31.5233	GO:0031987;GO:0043666;GO:0019722;GO:0048741;GO:0007614;GO:0002931;GO:0033173;GO:0006979;GO:0005737;GO:0005634;GO:000367	BP:locomotion involved in locomotory behavior;BP:regulation of phosphoprotein phosphatase activity;BP:calcium-mediated signaling;BP:skeletal muscle fiber development;BP:short-term memory;BP:response to ischemia;BP:calcineurin-NFAT signaling cascade;BP:response to oxidative stress;CC:cytoplasm;CC:nucleus;MF:nucleic acid binding;	ENOG4111I50	K:Transcription	XP_005657203.1	calcipressin-1 isoform X1 [Sus scrofa]	sp|P53805|RCAN1_HUMAN;	Calcipressin-1 OS=Homo sapiens OX=9606 GN=RCAN1 PE=1 SV=4;	PF04847.9	Calcipressin	Calcipressin
ENSSSCG00000032841	RF01955	-	2.313	1.20952	1.05448e-17	1.43274e-15	yes	up	106.84	237.25	------	------	------	------	------	------	------	------	------	------	------
ENSSSCG00000037614	RF01957	-	2.1	1.07025	1.38055e-21	2.06817e-19	yes	up	436.603	896.897	------	------	------	------	------	------	------	------	------	------	------
ENSSSCG00000037241	RGS2	regulator of G protein signaling 2 [Source:NCBI gene;Acc:733670]	2.378	1.24993	1.84073e-35	4.30178e-33	yes	up	9.24667	22.1167	GO:0043951;GO:0043407;GO:0008277;GO:0007049;GO:0060087;GO:0043547;GO:0009968;GO:0045744;GO:0050873;GO:0071877;GO:0007283;GO:0055119;GO:0010614;GO:0010519;GO:0060452;GO:0006417;GO:0009898;GO:0005737;GO:0140194;GO:0005730;GO:0005634;GO:0016020;GO:0005886;GO:0005829;GO:0001965;GO:000509	BP:negative regulation of cAMP-mediated signaling;BP:negative regulation of MAP kinase activity;BP:regulation of G-protein coupled receptor protein signaling pathway;BP:cell cycle;BP:relaxation of vascular smooth muscle;BP:positive regulation of GTPase activity;BP:negative regulation of signal transduction;BP:negative regulation of G-protein coupled receptor protein signaling pathway;BP:brown fat…	ENOG410YMJD	O:Posttranslational modification, protein turnover, chaperones	NP_001038065.1	regulator of G-protein signaling 2 [Sus scrofa]	sp|Q3S853|RGS2_PIG;	Regulator of G-protein signaling 2 OS=Sus scrofa OX=9823 GN=RGS2 PE=2 SV=2;	PF00615.16	RGS	Regulator of G protein signaling domain
ENSSSCG00000006335	RGS4	regulator of G protein signaling 4 [Source:NCBI gene;Acc:100157437]	3.89	1.95983	6.2894e-22	9.66995e-20	yes	up	1.19	4.47667	GO:0043547;GO:0000188;GO:0008277;GO:0007186;GO:0005737;GO:0005634;GO:0005886;GO:0044424;GO:0005096;GO:000551	BP:positive regulation of GTPase activity;BP:inactivation of MAPK activity;BP:regulation of G-protein coupled receptor protein signaling pathway;BP:G-protein coupled receptor signaling pathway;CC:cytoplasm;CC:nucleus;CC:plasma membrane;CC:intracellular part;MF:GTPase activator activity;MF:calmodulin binding;	ENOG410YMJD	S:Function unknown	XP_007457465.1	PREDICTED: LOW QUALITY PROTEIN: regulator of G-protein signaling 4 [Lipotes vexillifer]	sp|Q29RM9|RGS4_BOVIN;	Regulator of G-protein signaling 4 OS=Bos taurus OX=9913 GN=RGS4 PE=2 SV=1;	PF00615.16	RGS	Regulator of G protein signaling domain
ENSSSCG00000015549	RNASEL	ribonuclease L [Source:NCBI gene;Acc:100048946]	0.485	-1.04274	0.00325829	0.0325431	yes	down	0.733333	0.333333	GO:0006468;GO:0090501;GO:0051607;GO:0043488;GO:0046326;GO:0045071;GO:0045944;GO:0045444;GO:2001275;GO:0006397;GO:0004540;GO:0003723;GO:0005515;GO:0004672;GO:0043021;GO:0046872;GO:000552	BP:protein phosphorylation;BP:RNA phosphodiester bond hydrolysis;BP:defense response to virus;BP:regulation of mRNA stability;BP:positive regulation of glucose import;BP:negative regulation of viral genome replication;BP:positive regulation of transcription from RNA polymerase II promoter;BP:fat cell differentiation;BP:positive regulation of glucose import in response to insulin stimulus;BP:mRNA …	COG0666	S:Function unknown	NP_001090981.1	2-5A-dependent ribonuclease [Sus scrofa]	sp|Q05823|RN5A_HUMAN;	2-5A-dependent ribonuclease OS=Homo sapiens OX=9606 GN=RNASEL PE=1 SV=2;	PF12796.4;PF13637.3;PF13857.3;PF00023.27;PF06479.9;PF13606.3;PF00069.22;PF07714.14;PF06293.11	Ank_2;Ank_4;Ank_5;Ank;Ribonuc_2-5A;Ank_3;Pkinase;Pkinase_Tyr;Kdo	Ankyrin repeats;Ankyrin repeats;Ankyrin repeats;Ankyrin repeat;Ribonuclease 2-5A;Ankyrin repeat;Protein kinase domain;Protein tyrosine kinase;Lipopolysaccharide kinase
ENSSSCG00000038562	RND1	Rho family GTPase 1 [Source:NCBI gene;Acc:100737739]	6.512	2.703	1.7868e-14	2.04694e-12	yes	up	0.123333	0.766667	GO:0007015;GO:0016322;GO:0007162;GO:0007264;GO:0043231;GO:0005622;GO:0015629;GO:0005912;GO:0005886;GO:0003924;GO:0000166;GO:0005102;GO:000552	BP:actin filament organization;BP:neuron remodeling;BP:negative regulation of cell adhesion;BP:small GTPase mediated signal transduction;CC:intracellular membrane-bounded organelle;CC:intracellular;CC:actin cytoskeleton;CC:adherens junction;CC:plasma membrane;MF:GTPase activity;MF:nucleotide binding;MF:receptor binding;MF:GTP binding;	COG1100	S:Function unknown	XP_003481615.1	rho-related GTP-binding protein Rho6 [Sus scrofa]	sp|Q2HJ68|RND1_BOVIN;	Rho-related GTP-binding protein Rho6 OS=Bos taurus OX=9913 GN=RND1 PE=2 SV=1;	PF00071.19;PF08477.10;PF00025.18	Ras;Roc;Arf	Ras family;Ras of Complex, Roc, domain of DAPkinase;ADP-ribosylation factor family
ENSSSCG00000025208	RNF39	ring finger protein 39 [Source:NCBI gene;Acc:100141418]	3.102	1.63328	3.33921e-26	6.09667e-24	yes	up	4.42333	13.64	GO:0046872;GO:0008270;GO:000551	MF:metal ion binding;MF:zinc ion binding;MF:protein binding;	ENOG4111G04	S:Function unknown	NP_001121918.1	RING finger protein 39 [Sus scrofa]	sp|Q7YR31|RNF39_PANTR;	RING finger protein 39 OS=Pan troglodytes OX=9598 GN=RNF39 PE=3 SV=1;	PF13765.3;PF00097.22;PF15227.3;PF13445.3;PF14634.3;PF00622.25;PF14835.3	PRY;zf-C3HC4;zf-C3HC4_4;zf-RING_UBOX;zf-RING_5;SPRY;zf-RING_6	SPRY-associated domain;Zinc finger, C3HC4 type;zinc finger of C3HC4-type, RING;RING-type zinc-finger;zinc-RING finger domain;SPRY domain;zf-RING of BARD1-type protein
ENSSSCG00000029129	RWDD2A	RWD domain containing 2A [Source:NCBI gene;Acc:100155667]	0.491	-1.0262	7.05645e-07	3.04261e-05	yes	down	1.85667	0.863333	GO:000551	MF:protein binding;	ENOG410Y76V	C:Energy production and conversion	XP_001926603.1	RWD domain-containing protein 2A [Sus scrofa]	sp|Q9UIY3|RWD2A_HUMAN;	RWD domain-containing protein 2A OS=Homo sapiens OX=9606 GN=RWDD2A PE=1 SV=1;	PF06544.9;PF05773.19	DUF1115;RWD	Protein of unknown function;RWD domain
ENSSSCG00000012173	SAT1	spermidine/spermine N1-acetyltransferase 1 [Source:NCBI gene;Acc:397645]	2.541	1.34528	5.59063e-38	1.48469e-35	yes	up	262.543	552.533	GO:0042127;GO:0009447;GO:0001525;GO:0005737;GO:0005622;GO:0005515;GO:000414	BP:regulation of cell proliferation;BP:putrescine catabolic process;BP:angiogenesis;CC:cytoplasm;CC:intracellular;MF:protein binding;MF:diamine N-acetyltransferase activity;	COG0454	K:Transcription	XP_011843397.1	PREDICTED: diamine acetyltransferase 1 isoform X2 [Mandrillus leucophaeus]	sp|Q28999|SAT1_PIG;	Diamine acetyltransferase 1 OS=Sus scrofa OX=9823 GN=SAT1 PE=2 SV=1;	PF00583.22;PF13508.4;PF13673.4	Acetyltransf_1;Acetyltransf_7;Acetyltransf_10	Acetyltransferase;Acetyltransferase;Acetyltransferase
ENSSSCG00000004890	SERPINB2	serpin family B member 2 [Source:NCBI gene;Acc:100519286]	2.78	1.47505	2.30878e-05	0.000617348	yes	up	21.0167	56.6133	GO:0010951;GO:0043066;GO:0005737;GO:0005615;GO:000486	BP:negative regulation of endopeptidase activity;BP:negative regulation of apoptotic process;CC:cytoplasm;CC:extracellular space;MF:serine-type endopeptidase inhibitor activity;	COG4826	O:Posttranslational modification, protein turnover, chaperones	XP_003121745.2	plasminogen activator inhibitor 2 [Sus scrofa]	sp|P05120|PAI2_HUMAN;	Plasminogen activator inhibitor 2 OS=Homo sapiens OX=9606 GN=SERPINB2 PE=1 SV=2;	PF00079.17	Serpin	Serpin
ENSSSCG00000005636	SLC25A25	solute carrier family 25 member 25 [Source:NCBI gene;Acc:100156347]	2.064	1.04516	2.08372e-30	4.3479e-28	yes	up	7.81	14.77	GO:0014823;GO:0046034;GO:0070588;GO:0060612;GO:0045333;GO:0035264;GO:0002021;GO:0032094;GO:0043010;GO:0055085;GO:0016021;GO:0016020;GO:0005739;GO:0005743;GO:0022857;GO:000550	BP:response to activity;BP:ATP metabolic process;BP:calcium ion transmembrane transport;BP:adipose tissue development;BP:cellular respiration;BP:multicellular organism growth;BP:response to dietary excess;BP:response to food;BP:camera-type eye development;BP:transmembrane transport;CC:integral component of membrane;CC:membrane;CC:mitochondrion;CC:mitochondrial inner membrane;MF:transmembrane tran…	ENOG410XQ4P	S:Function unknown	XP_004849330.1	calcium-binding mitochondrial carrier protein SCaMC-2 isoform X1 [Heterocephalus glaber]	sp|Q0V7M4|SCMC2_BOVIN;	Calcium-binding mitochondrial carrier protein SCaMC-2 OS=Bos taurus OX=9913 GN=SLC25A25 PE=2 SV=1;	PF00153.24;PF00036.29;PF13499.3;PF13405.3;PF13202.3;PF13833.3	Mito_carr;EF-hand_1;EF-hand_7;EF-hand_6;EF-hand_5;EF-hand_8	Mitochondrial carrier protein;EF hand;EF-hand domain pair;EF-hand domain;EF hand;EF-hand domain pair
ENSSSCG00000011846	SLC51A	solute carrier family 51 alpha subunit [Source:NCBI gene;Acc:100512372]	3.059	1.61306	0.00434545	0.0404273	yes	up	0.08	0.23	GO:0032782;GO:0071702;GO:0015721;GO:0055085;GO:0043234;GO:0016021;GO:0016020;GO:0005789;GO:0032991;GO:0005886;GO:0016323;GO:0005215;GO:0022857;GO:0015125;GO:0046982;GO:004280	BP:bile acid secretion;BP:organic substance transport;BP:bile acid and bile salt transport;BP:transmembrane transport;CC:protein complex;CC:integral component of membrane;CC:membrane;CC:endoplasmic reticulum membrane;CC:macromolecular complex;CC:plasma membrane;CC:basolateral plasma membrane;MF:transporter activity;MF:transmembrane transporter activity;MF:bile acid transmembrane transporter activ…	ENOG410XW07	S:Function unknown	NP_001231195.1	organic solute transporter subunit alpha [Sus scrofa]	sp|Q86UW1|OSTA_HUMAN;	Organic solute transporter subunit alpha OS=Homo sapiens OX=9606 GN=SLC51A PE=2 SV=1;	PF03619.13	Solute_trans_a	Organic solute transporter Ostalpha
ENSSSCG00000007954	SLX4	SLX4 structure-specific endonuclease subunit [Source:NCBI gene;Acc:100515719]	0.489	-1.03186	6.56786e-12	6.44919e-10	yes	down	2.23333	1.00333	GO:0006281;GO:0000712;GO:0036297;GO:0000706;GO:0006260;GO:0043085;GO:0005634;GO:0033557;GO:0017108;GO:0048257;GO:0005515;GO:000882	BP:DNA repair;BP:resolution of meiotic recombination intermediates;BP:interstrand cross-link repair;BP:meiotic DNA double-strand break processing;BP:DNA replication;BP:positive regulation of catalytic activity;CC:nucleus;CC:Slx1-Slx4 complex;MF:5'-flap endonuclease activity;MF:3'-flap endonuclease activity;MF:protein binding;MF:crossover junction endodeoxyribonuclease activity;	ENOG410XPS5	L:Replication, recombination and repair	XP_013851158.2	structure-specific endonuclease subunit SLX4 isoform X1 [Sus scrofa]	sp|Q8IY92|SLX4_HUMAN;	Structure-specific endonuclease subunit SLX4 OS=Homo sapiens OX=9606 GN=SLX4 PE=1 SV=3;	PF09494.7;PF00651.28	Slx4;BTB	Slx4 endonuclease;BTB/POZ domain
ENSSSCG00000032613	SNAI1	snail family transcriptional repressor 1 [Source:NCBI gene;Acc:396583]	3.612	1.85281	5.32291e-29	1.05421e-26	yes	up	1.34	4.69667	GO:0007498;GO:1902230;GO:0060021;GO:0060972;GO:2000810;GO:0001649;GO:0001707;GO:0000122;GO:0070828;GO:0016477;GO:0003198;GO:0061314;GO:0030335;GO:0060707;GO:0045892;GO:0045893;GO:0031069;GO:0010957;GO:0010718;GO:0060806;GO:0001837;GO:0006357;GO:0060536;GO:0043518;GO:0005737;GO:0005634;GO:0005721;GO:0005829;GO:0003676;GO:0070888;GO:0043565;GO:0019900;GO:0001227;GO:000097	BP:mesoderm development;BP:negative regulation of intrinsic apoptotic signaling pathway in response to DNA damage;BP:palate development;BP:left/right pattern formation;BP:regulation of bicellular tight junction assembly;BP:osteoblast differentiation;BP:mesoderm formation;BP:negative regulation of transcription from RNA polymerase II promoter;BP:heterochromatin organization;BP:cell migration;BP:ep…	ENOG41106JS	S:Function unknown	XP_020933620.1	zinc finger protein SNAI1 [Sus scrofa]	sp|O95863|SNAI1_HUMAN;	Zinc finger protein SNAI1 OS=Homo sapiens OX=9606 GN=SNAI1 PE=1 SV=2;	PF00096.23;PF13894.3;PF13465.3;PF12171.5;PF13912.3	zf-C2H2;zf-C2H2_4;zf-H2C2_2;zf-C2H2_jaz;zf-C2H2_6	Zinc finger, C2H2 type;C2H2-type zinc finger;Zinc-finger double domain;Zinc-finger double-stranded RNA-binding;C2H2-type zinc finger
ENSSSCG00000026741	TBCC	tubulin folding cofactor C [Source:NCBI gene;Acc:100157124]	0.43	-1.21832	2.07493e-09	1.44319e-07	yes	down	25.1467	10.4867	GO:0007021;GO:0006457;GO:0000902;GO:0009987;GO:0007023;GO:0005737;GO:0005829;GO:0032391;GO:0015631;GO:0003924;GO:0000166;GO:000552	BP:tubulin complex assembly;BP:protein folding;BP:cell morphogenesis;BP:cellular process;BP:post-chaperonin tubulin folding pathway;CC:cytoplasm;CC:cytosol;CC:photoreceptor connecting cilium;MF:tubulin binding;MF:GTPase activity;MF:nucleotide binding;MF:GTP binding;	ENOG410Y28B	O:Posttranslational modification, protein turnover, chaperones	NP_001245336.1	tubulin-specific chaperone C [Sus scrofa]	sp|Q3SZE9|TBCC_BOVIN;	Tubulin-specific chaperone C OS=Bos taurus OX=9913 GN=TBCC PE=2 SV=1;	PF07986.9;PF16752.2	TBCC;TBCC_N	Tubulin binding cofactor C;Tubulin-specific chaperone C N-terminal domain
ENSSSCG00000032320	TCIM	transcriptional and immune response regulator [Source:NCBI gene;Acc:100628052]	2.762	1.46576	7.76911e-32	1.65058e-29	yes	up	21.6233	57.7067	GO:1902806;GO:0010739;GO:0034605;GO:0006915;GO:0002264;GO:1900020;GO:0045746;GO:1901224;GO:0043066;GO:0042346;GO:1903706;GO:0043620;GO:0016607;GO:0005737;GO:0005829;GO:0005730;GO:0005634;GO:0005654;GO:0005886;GO:000511	BP:regulation of cell cycle G1/S phase transition;BP:positive regulation of protein kinase A signaling;BP:cellular response to heat;BP:apoptotic process;BP:endothelial cell activation involved in immune response;BP:positive regulation of protein kinase C activity;BP:negative regulation of Notch signaling pathway;BP:positive regulation of NIK/NF-kappaB signaling;BP:negative regulation of apoptotic…	ENOG410YPN0	S:Function unknown	XP_003432158.2	protein C8orf4 homolog [Canis lupus familiaris]	sp|Q5E969|TCIM_BOVIN;	Transcriptional and immune response regulator OS=Bos taurus OX=9913 GN=TCIM PE=3 SV=1;	PF15063.3	TC1	Thyroid cancer protein 1
ENSSSCG00000036755	TENT5B	terminal nucleotidyltransferase 5B [Source:NCBI gene;Acc:100511570]	0.472	-1.08372	7.59948e-11	6.67668e-09	yes	down	11.6867	5.34667	GO:199081	MF:RNA adenylyltransferase activity;	ENOG410XTG4	S:Function unknown	XP_003127772.4	LOW QUALITY PROTEIN: protein FAM46B [Sus scrofa]	sp|Q29RH2|FA46B_BOVIN;	Putative nucleotidyltransferase FAM46B OS=Bos taurus OX=9913 GN=FAM46B PE=2 SV=1;	PF07984.9	NTP_transf_7	Nucleotidyltransferase
ENSSSCG00000004154	TNFAIP3	TNF alpha induced protein 3 [Source:NCBI gene;Acc:100622156]	4.414	2.14216	4.68209e-39	1.36775e-36	yes	up	3.68667	14.7667	GO:1902042;GO:0001922;GO:2000347;GO:2000349;GO:0071108;GO:0072666;GO:0071947;GO:0030177;GO:0032495;GO:1990168;GO:0070936;GO:0050728;GO:0045732;GO:0002677;GO:0070433;GO:0035871;GO:0032691;GO:0060548;GO:0043124;GO:0031397;GO:0016477;GO:0016579;GO:0032720;GO:0070536;GO:1903364;GO:0050713;GO:0048662;GO:0032703;GO:0034148;GO:0070301;GO:2000352;GO:0002634;GO:0034140;GO:0035523;GO:0050869;GO:0072573;GO:…	BP:negative regulation of extrinsic apoptotic signaling pathway via death domain receptors;BP:B-1 B cell homeostasis;BP:positive regulation of hepatocyte proliferation;BP:negative regulation of CD40 signaling pathway;BP:protein K48-linked deubiquitination;BP:establishment of protein localization to vacuole;BP:protein deubiquitination involved in ubiquitin-dependent protein catabolic process;BP:po…	ENOG41117NJ	O:Posttranslational modification, protein turnover, chaperones	XP_005659239.1	tumor necrosis factor alpha-induced protein 3 isoform X1 [Sus scrofa]	sp|P21580|TNAP3_HUMAN;	Tumor necrosis factor alpha-induced protein 3 OS=Homo sapiens OX=9606 GN=TNFAIP3 PE=1 SV=1;	PF02338.16;PF01754.13	OTU;zf-A20	OTU-like cysteine protease;A20-like zinc finger
ENSSSCG00000038500	TRIB1	tribbles pseudokinase 1 [Source:NCBI gene;Acc:100512960]	2.202	1.13876	8.73702e-27	1.62051e-24	yes	up	6.65	14.5733	GO:0032436;GO:0014912;GO:0043405;GO:0032496;GO:0002763;GO:0009966;GO:0000165;GO:0030852;GO:0006468;GO:0006469;GO:0048662;GO:0007254;GO:0043433;GO:0045659;GO:0045651;GO:0031665;GO:0045645;GO:0005737;GO:0005634;GO:0044424;GO:0019899;GO:0055106;GO:0031434;GO:0004672;GO:0030234;GO:0005524;GO:0008134;GO:0004860;GO:003162	BP:positive regulation of proteasomal ubiquitin-dependent protein catabolic process;BP:negative regulation of smooth muscle cell migration;BP:regulation of MAP kinase activity;BP:response to lipopolysaccharide;BP:positive regulation of myeloid leukocyte differentiation;BP:regulation of signal transduction;BP:MAPK cascade;BP:regulation of granulocyte differentiation;BP:protein phosphorylation;BP:n…	COG0515	O:Posttranslational modification, protein turnover, chaperones	XP_020944586.1	tribbles homolog 1 isoform X1 [Sus scrofa]	sp|Q96RU8|TRIB1_HUMAN;	Tribbles homolog 1 OS=Homo sapiens OX=9606 GN=TRIB1 PE=1 SV=2;	PF00069.22;PF07714.14;PF14531.3	Pkinase;Pkinase_Tyr;Kinase-like	Protein kinase domain;Protein tyrosine kinase;Kinase-like
ENSSSCG00000029226	UBC	ubiquitin C [Source:NCBI gene;Acc:396966]	2.067	1.04732	6.50458e-64	3.16692e-61	yes	up	665.297	1331.72	GO:0005737;GO:0002020;GO:000551	CC:cytoplasm;MF:protease binding;MF:protein binding;	COG5272;COG1552	U:Intracellular trafficking, secretion, and vesicular transport;J:Translation, ribosomal structure and biogenesis	XP_003483459.2	polyubiquitin-C [Sus scrofa]	sp|P0CG71|UBIQ1_CAEEL;	Polyubiquitin-A OS=Caenorhabditis elegans OX=6239 GN=ubq-1 PE=3 SV=1;	PF00240.20;PF11976.5;PF14560.3	ubiquitin;Rad60-SLD;Ubiquitin_2	Ubiquitin family;Ubiquitin-2 like Rad60 SUMO-like;Ubiquitin-like domain
ENSSSCG00000012305	USP27X	ubiquitin specific peptidase 27 X-linked [Source:HGNC Symbol;Acc:HGNC:13486]	0.328	-1.60667	0.00110286	0.0140841	yes	down	0.983333	0.313333	GO:0050821;GO:0071108;GO:0043065;GO:0006511;GO:0006508;GO:0016579;GO:0070536;GO:0061578;GO:0016787;GO:1990380;GO:0008234;GO:0004843;GO:0008270;GO:0008233;GO:0046872;GO:003645	BP:protein stabilization;BP:protein K48-linked deubiquitination;BP:positive regulation of apoptotic process;BP:ubiquitin-dependent protein catabolic process;BP:proteolysis;BP:protein deubiquitination;BP:protein K63-linked deubiquitination;MF:Lys63-specific deubiquitinase activity;MF:hydrolase activity;MF:Lys48-specific deubiquitinase activity;MF:cysteine-type peptidase activity;MF:thiol-dependent…	ENOG410XQQ0	S:Function unknown	XP_003135145.2	ubiquitin carboxyl-terminal hydrolase 27 [Sus scrofa]	sp|Q6GNI6|UB22A_XENLA;	Ubiquitin carboxyl-terminal hydrolase 22-A OS=Xenopus laevis OX=8355 GN=usp22-a PE=2 SV=1;	PF00443.26;PF13423.3;PF02148.16;PF15499.3	UCH;UCH_1;zf-UBP;Peptidase_C98	Ubiquitin carboxyl-terminal hydrolase;Ubiquitin carboxyl-terminal hydrolase;Zn-finger in ubiquitin-hydrolases and other protein;Ubiquitin-specific peptidase-like, SUMO isopeptidase
ENSSSCG00000022310	VPS9D1	VPS9 domain containing 1 [Source:NCBI gene;Acc:100627090]	2	1.00001	0.000651207	0.00912069	yes	up	0.616667	1.25	------	------	ENOG410YGIS	S:Function unknown	XP_003355754.2	VPS9 domain-containing protein 1 isoform X12 [Sus scrofa]	sp|Q8C190|VP9D1_MOUSE;	VPS9 domain-containing protein 1 OS=Mus musculus OX=10090 GN=Vps9d1 PE=1 SV=1;	PF02204.15	VPS9	Vacuolar sorting protein 9
ENSSSCG00000037815	ZC3H12A	zinc finger CCCH-type containing 12A [Source:NCBI gene;Acc:110261148]	3	1.58493	1.01151e-29	2.07359e-27	yes	up	3.49333	9.41	GO:0071222;GO:1903799;GO:0010629;GO:2000627;GO:0010628;GO:0010942;GO:0042347;GO:0071356;GO:0045766;GO:0045019;GO:0051259;GO:0010508;GO:0045600;GO:0032720;GO:0090502;GO:2000379;GO:1902714;GO:0090503;GO:0061014;GO:1904468;GO:1904628;GO:0061158;GO:0055118;GO:0010656;GO:1990869;GO:0050713;GO:1900016;GO:0010595;GO:1900165;GO:0032088;GO:0032715;GO:0010884;GO:0045944;GO:1904637;GO:0000932;GO:0042406;GO:…	BP:cellular response to lipopolysaccharide;BP:negative regulation of production of miRNAs involved in gene silencing by miRNA;BP:negative regulation of gene expression;BP:positive regulation of miRNA catabolic process;BP:positive regulation of gene expression;BP:positive regulation of cell death;BP:negative regulation of NF-kappaB import into nucleus;BP:cellular response to tumor necrosis factor;…	ENOG410ZNK1	U:Intracellular trafficking, secretion, and vesicular transport	XP_020951622.1	endoribonuclease ZC3H12A [Sus scrofa]	sp|A6QQJ8|ZC12A_BOVIN;	Ribonuclease ZC3H12A OS=Bos taurus OX=9913 GN=ZC3H12A PE=2 SV=1;	PF11977.5	RNase_Zc3h12a	Zc3h12a-like Ribonuclease NYN domain
ENSSSCG00000007554	ZFAND2A	zinc finger AN1-type containing 2A [Source:NCBI gene;Acc:100521185]	3.085	1.62529	4.51013e-50	1.59699e-47	yes	up	14.2833	28.2	GO:0032436;GO:0071243;GO:0000502;GO:0046872;GO:000827	BP:positive regulation of proteasomal ubiquitin-dependent protein catabolic process;BP:cellular response to arsenic-containing substance;CC:proteasome complex;MF:metal ion binding;MF:zinc ion binding;	ENOG4111JCH	U:Intracellular trafficking, secretion, and vesicular transport	XP_003124293.1	AN1-type zinc finger protein 2A [Sus scrofa]	sp|Q5R966|ZFN2A_PONAB;	AN1-type zinc finger protein 2A OS=Pongo abelii OX=9601 GN=ZFAND2A PE=3 SV=1;	PF01428.13	zf-AN1	AN1-like Zinc finger
ENSSSCG00000028056	ZFP36	ZFP36 ring finger protein [Source:NCBI gene;Acc:100316849]	4.12	2.04281	5.57112e-16	7.23317e-14	yes	up	30.93	123.313	GO:0071222;GO:1904246;GO:0038066;GO:0009611;GO:0035556;GO:0050728;GO:0000289;GO:0000122;GO:0071356;GO:0000165;GO:0044344;GO:0045600;GO:1900153;GO:0000288;GO:0045085;GO:0061014;GO:0061158;GO:0060213;GO:0035278;GO:0043488;GO:0050779;GO:0045638;GO:0006357;GO:1990904;GO:0030014;GO:0005737;GO:0005634;GO:0005829;GO:0070063;GO:0017091;GO:0003730;GO:0046872;GO:0071889;GO:0035925;GO:000372	BP:cellular response to lipopolysaccharide;BP:negative regulation of polynucleotide adenylyltransferase activity;BP:p38MAPK cascade;BP:response to wounding;BP:intracellular signal transduction;BP:negative regulation of inflammatory response;BP:nuclear-transcribed mRNA pol;BP:negative regulation of transcription from RNA polymerase II promoter;BP:cellular response to tumor necrosis factor;BP:MAPK …	COG5063;ENOG4111K6Y	K:Transcription;	NP_001161891.1	tristetraprolin [Sus scrofa]	sp|A1A4Q8|MED29_BOVIN;	Mediator of RNA polymerase II transcription subunit 29 OS=Bos taurus OX=9913 GN=MED29 PE=2 SV=1;	PF00642.21;PF14608.3	zf-CCCH;zf-CCCH_2	Zinc finger C-x8-C-x5-C-x3-H type;RNA-binding, Nab2-type zinc finger
ENSSSCG00000036693	ZNF658	zinc finger protein 658 [Source:NCBI gene;Acc:110255680]	0.406	-1.29905	0.00297587	0.0304103	yes	down	0.393333	0.153333	GO:0071294;GO:0042254;GO:0006355;GO:0045892;GO:0005622;GO:0000976;GO:0003676;GO:004687	BP:cellular response to zinc ion;BP:ribosome biogenesis;BP:regulation of transcription, DNA-templated;BP:negative regulation of transcription, DNA-templated;CC:intracellular;MF:transcription regulatory region sequence-specific DNA binding;MF:nucleic acid binding;MF:metal ion binding;	COG5048	S:Function unknown	XP_020920367.1	zinc finger protein 658 isoform X2 [Sus scrofa]	sp|Q5TYW1|ZN658_HUMAN;	Zinc finger protein 658 OS=Homo sapiens OX=9606 GN=ZNF658 PE=1 SV=2;	PF13465.3;PF00096.23;PF13894.3;PF13912.3;PF01352.24;PF12171.5;PF09723.7	zf-H2C2_2;zf-C2H2;zf-C2H2_4;zf-C2H2_6;KRAB;zf-C2H2_jaz;Zn-ribbon_8	Zinc-finger double domain;Zinc finger, C2H2 type;C2H2-type zinc finger;C2H2-type zinc finger;KRAB box;Zinc-finger double-stranded RNA-binding;Zinc ribbon domain
ENSSSCG00000033070		-	14.928	3.89996	3.64154e-226	8.51028e-223	yes	up	6.08333	24.4467	------	------	------	------	XP_020954391.1	cullin-7 isoform X1 [Sus scrofa]	------	------	------	------	------
ENSSSCG00000036303		-	14.153	3.82304	7.48443e-126	9.71728e-123	yes	up	1.67667	22.86	GO:0006596;GO:000382	BP:polyamine biosynthetic process;MF:catalytic activity;	COG0019	E:Amino acid transport and metabolism	XP_020941548.1	ornithine decarboxylase isoform X1 [Sus scrofa]	sp|P11926|DCOR_HUMAN;	Ornithine decarboxylase OS=Homo sapiens OX=9606 GN=ODC1 PE=1 SV=2;	PF00278.19	Orn_DAP_Arg_deC	Pyridoxal-dependent decarboxylase, C-terminal sheet domain
ENSSSCG00000031912		-	10.585	3.40399	0	0	yes	up	55.0967	565.547	------	------	ENOG410XRWH	G:Carbohydrate transport and metabolism	XP_021539627.1	transcription factor AP-1 isoform X2 [Neomonachus schauinslandi]	sp|O77627|JUN_BOVIN;	Transcription factor AP-1 OS=Bos taurus OX=9913 GN=JUN PE=2 SV=2;	------	------	------
MSTRG.14632		-	7.366	2.88086	7.58508e-32	1.64133e-29	yes	up	0.193333	1.38	GO:001602	CC:integral component of membrane;	------	------	XP_020954391.1	cullin-7 isoform X1 [Sus scrofa]	------	------	------	------	------
ENSSSCG00000031255		-	6.524	2.70582	1.82926e-07	9.05718e-06	yes	up	0.16	0.98	GO:0006334;GO:0070062;GO:0000786;GO:0000788;GO:0005694;GO:0005634;GO:0003677;GO:004698	BP:nucleosome assembly;CC:extracellular exosome;CC:nucleosome;CC:nuclear nucleosome;CC:chromosome;CC:nucleus;MF:DNA binding;MF:protein heterodimerization activity;	ENOG4111NV5;COG5262	B:Chromatin structure and dynamics;	XP_013832959.2	histone H2B type 1-N [Sus scrofa]	sp|Q6DRA6|H2B2D_HUMAN;	Putative histone H2B type 2-D OS=Homo sapiens OX=9606 GN=HIST2H2BD PE=5 SV=3;	PF00125.21	Histone	Core histone H2A/H2B/H3/H4
ENSSSCG00000037674		-	5.428	2.44052	1.0386e-40	3.1118e-38	yes	up	13.9867	85.6633	GO:1904714;GO:0006355;GO:0071364;GO:0006414;GO:0005853;GO:0005829;GO:0005615;GO:0005730;GO:0043209;GO:0070062;GO:0098574;GO:0005737;GO:0030864;GO:0032587;GO:0000049;GO:0044822;GO:0003924;GO:0019901;GO:0003746;GO:000552	BP:regulation of chaperone-mediated autophagy;BP:regulation of transcription, DNA-templated;BP:cellular response to epidermal growth factor stimulus;BP:translational elongation;CC:eukaryotic translation elongation factor 1 complex;CC:cytosol;CC:extracellular space;CC:nucleolus;CC:myelin sheath;CC:extracellular exosome;CC:cytoplasmic side of lysosomal membrane;CC:cytoplasm;CC:cortical actin cytosk…	COG5256	J:Translation, ribosomal structure and biogenesis	XP_022281420.1	elongation factor 1-alpha 1 isoform X1 [Canis lupus familiaris]	sp|P68104|EF1A1_HUMAN;	Elongation factor 1-alpha 1 OS=Homo sapiens OX=9606 GN=EEF1A1 PE=1 SV=1;	------	------	------
MSTRG.6222		-	5.257	2.39421	1.61495e-25	2.85919e-23	yes	up	2.71333	9.30333	------	------	------	------	XP_019308313.1	PREDICTED: uncharacterized protein LOC109269005 isoform X1 [Panthera pardus]	------	------	------	------	------
ENSSSCG00000003155		protein phosphatase 1 regulatory subunit 15A [Source:NCBI gene;Acc:100522679]	5.129	2.35877	0	0	yes	up	47.3133	211.88	GO:0032516;GO:0034976;GO:0005737;GO:0005783;GO:0000164;GO:001988	BP:positive regulation of phosphoprotein phosphatase activity;BP:response to endoplasmic reticulum stress;CC:cytoplasm;CC:endoplasmic reticulum;CC:protein phosphatase type 1 complex;MF:protein phosphatase regulator activity;	ENOG410Y1YJ	T:Signal transduction mechanisms	XP_005664746.2	protein phosphatase 1 regulatory subunit 15A [Sus scrofa]	sp|Q2KI51|PR15A_BOVIN;	Protein phosphatase 1 regulatory subunit 15A OS=Bos taurus OX=9913 GN=PPP1R15A PE=2 SV=2;	PF10488.6	PP1c_bdg	Phosphatase-1 catalytic subunit binding region
ENSSSCG00000029160		-	3.487	1.80197	2.51471e-179	4.8974e-176	yes	up	455.687	1537.32	GO:0005737;GO:0005524;GO:000016	CC:cytoplasm;MF:ATP binding;MF:nucleotide binding;	COG0443	S:Function unknown	NP_998931.1	heat shock 70 kDa protein 1B [Sus scrofa]	sp|Q6S4N2|HS71B_PIG;	Heat shock 70 kDa protein 1B OS=Sus scrofa OX=9823 GN=HSPA1B PE=2 SV=1;	PF00012.17;PF06723.10	HSP70;MreB_Mbl	Hsp70 protein;MreB/Mbl protein
ENSSSCG00000035013		-	3.404	1.76711	3.00775e-05	0.000762376	yes	up	0.283333	0.93	------	------	ENOG410XP20	S:Function unknown	EGW02784.1	hypothetical protein I79_007524 [Cricetulus griseus]	sp|Q14498|RBM39_HUMAN;	RNA-binding protein 39 OS=Homo sapiens OX=9606 GN=RBM39 PE=1 SV=2;	------	------	------
MSTRG.6398		-	3.193	1.67469	1.95177e-08	1.14032e-06	yes	up	0.336667	1.04333	------	------	COG0724	S:Function unknown	XP_020954391.1	cullin-7 isoform X1 [Sus scrofa]	------	------	------	------	------
MSTRG.5639		-	3.19	1.67337	0.00267198	0.0279258	yes	up	1.39333	4.29667	GO:0019068;GO:0015074;GO:0004523;GO:0004190;GO:0008270;GO:000367	BP:virion assembly;BP:DNA integration;MF:RNA-DNA hybrid ribonuclease activity;MF:aspartic-type endopeptidase activity;MF:zinc ion binding;MF:nucleic acid binding;	ENOG410ZYAK	S:Function unknown	CAJ76246.1	polyprotein [Sus scrofa]	sp|P03359|POL_WMSV;	Gag-Pol polyprotein OS=Woolly monkey sarcoma virus OX=11970 GN=pol PE=3 SV=2;	PF00077.20;PF00098.23	RVP;zf-CCHC	Retroviral aspartyl protease;Zinc knuckle
ENSSSCG00000031657		JunD proto-oncogene, AP-1 transcription factor subunit [Source:NCBI gene;Acc:110259314]	3.003	1.58656	1.5277e-86	1.19008e-83	yes	up	54.7367	159.15	GO:0009416;GO:0032496;GO:0010941;GO:0000122;GO:0009612;GO:0045669;GO:0042127;GO:0007623;GO:0034097;GO:0071277;GO:0051591;GO:0043434;GO:0007568;GO:0051726;GO:0042493;GO:0032870;GO:0045944;GO:0002076;GO:0005634;GO:0000790;GO:0032993;GO:0005667;GO:0019899;GO:0003713;GO:0000981;GO:0008134;GO:0016922;GO:0003700;GO:000097	BP:response to light stimulus;BP:response to lipopolysaccharide;BP:regulation of cell death;BP:negative regulation of transcription from RNA polymerase II promoter;BP:response to mechanical stimulus;BP:positive regulation of osteoblast differentiation;BP:regulation of cell proliferation;BP:circadian rhythm;BP:response to cytokine;BP:cellular response to calcium ion;BP:response to cAMP;BP:response…	ENOG410XRWH	K:Transcription	XP_023085438.1	transcription factor jun-D isoform X1 [Piliocolobus tephrosceles]	sp|P17535|JUND_HUMAN;	Transcription factor jun-D OS=Homo sapiens OX=9606 GN=JUND PE=1 SV=3;	------	------	------
ENSSSCG00000036956		suppressor of cytokine signaling 3 [Source:NCBI gene;Acc:493186]	2.973	1.57195	5.54229e-08	2.97072e-06	yes	up	18.7067	53.83	GO:0050728;GO:0046627;GO:0060708;GO:0060707;GO:0007259;GO:0045597;GO:0016567;GO:0043066;GO:0060670;GO:0060674;GO:0035556;GO:0001932;GO:000562	BP:negative regulation of inflammatory response;BP:negative regulation of insulin receptor signaling pathway;BP:spongiotrophoblast differentiation;BP:trophoblast giant cell differentiation;BP:JAK-STAT cascade;BP:positive regulation of cell differentiation;BP:protein ubiquitination;BP:negative regulation of apoptotic process;BP:branching involved in labyrinthine layer morphogenesis;BP:placenta blo…	ENOG4111V4J	S:Function unknown	XP_008766620.1	PREDICTED: suppressor of cytokine signaling 3 isoform X1 [Rattus norvegicus]	sp|O35718|SOCS3_MOUSE;	Suppressor of cytokine signaling 3 OS=Mus musculus OX=10090 GN=Socs3 PE=1 SV=1;	PF00017.21;PF07525.13	SH2;SOCS_box	SH2 domain;SOCS box
ENSSSCG00000006350		Fc fragment of IgG, low affinity IIb, receptor (CD32) [Source:NCBI gene;Acc:613131]	2.664	1.4138	3.58863e-05	0.000892194	yes	up	16.1433	34.7067	GO:0016021;GO:001602	CC:integral component of membrane;CC:membrane;	ENOG410YXNK	U:Intracellular trafficking, secretion, and vesicular transport	XP_013852272.1	low affinity immunoglobulin gamma Fc region receptor II-b isoform X1 [Sus scrofa]	sp|P31994|FCG2B_HUMAN;	Low affinity immunoglobulin gamma Fc region receptor II-b OS=Homo sapiens OX=9606 GN=FCGR2B PE=1 SV=2;	PF13895.3;PF13927.3;PF00047.22;PF16680.2	Ig_2;Ig_3;ig;Ig_4	Immunoglobulin domain;Immunoglobulin domain;Immunoglobulin domain;T-cell surface glycoprotein CD3 delta chain
MSTRG.8035		-	2.556	1.35371	0.000921147	0.012176	yes	up	12.4667	30.4933	GO:0019068;GO:0015074;GO:0004523;GO:0004190;GO:0008270;GO:000367	BP:virion assembly;BP:DNA integration;MF:RNA-DNA hybrid ribonuclease activity;MF:aspartic-type endopeptidase activity;MF:zinc ion binding;MF:nucleic acid binding;	------	------	CAJ76246.1	polyprotein [Sus scrofa]	sp|P03359|POL_WMSV;	Gag-Pol polyprotein OS=Woolly monkey sarcoma virus OX=11970 GN=pol PE=3 SV=2;	PF00078.27;PF17919.1;PF17917.1;PF00429.19;PF02093.16;PF00098.23;PF00607.20;PF00665.26;PF09337.10;PF17921.1;PF16721.5;PF00077.20	RVT_1;RT_RNaseH_2;RT_RNaseH;TLV_coat;Gag_p30;zf-CCHC;Gag_p24;rve;zf-H2C2;Integrase_H2C2;zf-H3C2;RVP	Reverse transcriptase;RNase H-like domain found in reverse transcriptase;RNase H-like domain found in reverse transcriptase;ENV polyprotein;Gag P30 core shell protein;Zinc knuckle;gag gene protein p24;Integrase core domain;H2C2 zinc finger;Integrase zinc binding domain;Zinc-finger like, probable DNA-binding;Retroviral aspartyl protease
ENSSSCG00000035037		salt inducible kinase 1 [Source:NCBI gene;Acc:100621265]	2.475	1.30755	3.95106e-14	4.39697e-12	yes	up	2.95	7.07	GO:0006468;GO:0043153;GO:0010868;GO:0007346;GO:0032792;GO:0045595;GO:0043276;GO:0010830;GO:0035556;GO:0045721;GO:0055007;GO:0005737;GO:0005634;GO:0000287;GO:0008140;GO:0019901;GO:0004674;GO:0004672;GO:0042826;GO:000552	BP:protein phosphorylation;BP:entrainment of circadian clock by photoperiod;BP:negative regulation of triglyceride biosynthetic process;BP:regulation of mitotic cell cycle;BP:negative regulation of CREB transcription factor activity;BP:regulation of cell differentiation;BP:anoikis;BP:regulation of myotube differentiation;BP:intracellular signal transduction;BP:negative regulation of gluconeogenes…	ENOG410XNQ0	S:Function unknown	XP_020926717.1	serine/threonine-protein kinase SIK1 [Sus scrofa]	sp|Q9R1U5|SIK1_RAT;	Serine/threonine-protein kinase SIK1 OS=Rattus norvegicus OX=10116 GN=Sik1 PE=1 SV=1;	PF00069.22;PF07714.14;PF14531.3	Pkinase;Pkinase_Tyr;Kinase-like	Protein kinase domain;Protein tyrosine kinase;Kinase-like
MSTRG.6632		-	2.339	1.22575	0.00467775	0.0427294	yes	up	3.35667	7.60333	------	------	------	------	ELR57550.1	Metastasis-associated lung adenocarcinoma transcript 1, partial [Bos mutus]	------	------	------	------	------
ENSSSCG00000039833		-	2.134	1.09341	2.50103e-06	9.36682e-05	yes	up	0.476667	0.983333	GO:0034968;GO:0032259;GO:0005634;GO:0018024;GO:0016740;GO:0005515;GO:000816	BP:histone lysine methylation;BP:methylation;CC:nucleus;MF:histone-lysine N-methyltransferase activity;MF:transferase activity;MF:protein binding;MF:methyltransferase activity;	COG2940	S:Function unknown	XP_003127115.3	LOW QUALITY PROTEIN: histone-lysine N-methyltransferase 2B [Sus scrofa]	sp|Q9UMN6|KMT2B_HUMAN;	Histone-lysine N-methyltransferase 2B OS=Homo sapiens OX=9606 GN=KMT2B PE=1 SV=1;	PF00856.25	SET	SET domain
MSTRG.1595		-	2.027	1.01927	0.00449492	0.0414875	yes	up	0.91	1.78333	GO:0003964;GO:000451	MF:RNA-directed DNA polymerase activity;MF:endonuclease activity;	------	------	XP_020919943.1	uncharacterized protein LOC110255605 [Sus scrofa]	sp|O00370|LORF2_HUMAN;	LINE-1 retrotransposable element ORF2 protein OS=Homo sapiens OX=9606 PE=1 SV=1;	------	------	------
MSTRG.8036		-	2.009	1.00647	3.97258e-05	0.000963062	yes	up	1.64	3.19	GO:0019068;GO:0015074;GO:0004523;GO:0004190;GO:0008270;GO:000367	BP:virion assembly;BP:DNA integration;MF:RNA-DNA hybrid ribonuclease activity;MF:aspartic-type endopeptidase activity;MF:zinc ion binding;MF:nucleic acid binding;	------	------	CAJ76246.1	polyprotein [Sus scrofa]	sp|P03359|POL_WMSV;	Gag-Pol polyprotein OS=Woolly monkey sarcoma virus OX=11970 GN=pol PE=3 SV=2;	PF00078.27;PF17919.1;PF17917.1;PF02093.16;PF00098.23;PF00607.20;PF00665.26;PF09337.10;PF17921.1;PF16721.5;PF00077.20;PF00429.19	RVT_1;RT_RNaseH_2;RT_RNaseH;Gag_p30;zf-CCHC;Gag_p24;rve;zf-H2C2;Integrase_H2C2;zf-H3C2;RVP;TLV_coat	Reverse transcriptase;RNase H-like domain found in reverse transcriptase;RNase H-like domain found in reverse transcriptase;Gag P30 core shell protein;Zinc knuckle;gag gene protein p24;Integrase core domain;H2C2 zinc finger;Integrase zinc binding domain;Zinc-finger like, probable DNA-binding;Retroviral aspartyl protease;ENV polyprotein
ENSSSCG00000018061		-	0.499	-1.00203	0.0023633	0.0254988	yes	down	191.367	92.45	------	------	------	------	XP_006164775.1	PREDICTED: olfactory receptor 7A17, partial [Tupaia chinensis]	------	------	------	------	------
ENSSSCG00000001859		GDP-D-glucose phosphorylase 1 [Source:NCBI gene;Acc:100156697]	0.483	-1.05114	0.000575559	0.00831323	yes	down	3.15333	1.46333	GO:0006006;GO:0005737;GO:008004	BP:glucose metabolic process;CC:cytoplasm;MF:GDP-D-glucose phosphorylase activity;	ENOG4111FR6	S:Function unknown	XP_003482284.1	GDP-D-glucose phosphorylase 1 [Sus scrofa]	sp|Q5E9T1|GDPP1_BOVIN;	GDP-D-glucose phosphorylase 1 OS=Bos taurus OX=9913 GN=GDPGP1 PE=2 SV=1;	------	------	------
ENSSSCG00000018060		-	0.469	-1.09314	2.29828e-05	0.000615951	yes	down	22.8167	10.2867	------	------	------	------	------	------	------	------	------	------	------
ENSSSCG00000034092		metallo-beta-lactamase domain containing 1 [Source:NCBI gene;Acc:110259874]	0.455	-1.13452	9.44736e-09	5.84087e-07	yes	down	7.42	3.27333	GO:0016787;GO:004687	MF:hydrolase activity;MF:metal ion binding;	ENOG4111N4G	S:Function unknown	XP_020941865.1	metallo-beta-lactamase domain-containing protein 1 [Sus scrofa]	sp|Q2HJB0|MBLC1_BOVIN;	Metallo-beta-lactamase domain-containing protein 1 OS=Bos taurus OX=9913 GN=MBLAC1 PE=2 SV=1;	------	------	------
MSTRG.12765		-	0.446	-1.16604	2.80196e-05	0.000718002	yes	down	17.51	7.53	------	------	------	------	XP_020954391.1	cullin-7 isoform X1 [Sus scrofa]	------	------	------	------	------
MSTRG.5264		-	0.437	-1.19319	6.53215e-05	0.00147851	yes	down	8.62	3.60333	GO:0016021;GO:000573	CC:integral component of membrane;CC:mitochondrion;	------	------	AAA31986.1	ORF (mitochondrion) [Orcinus orca]	------	------	------	------	------
ENSSSCG00000028085		coiled-coil domain containing 96 [Source:NCBI gene;Acc:100622449]	0.428	-1.22315	0.000173555	0.00326568	yes	down	1.99667	0.823333	------	------	ENOG410ZEWV	S:Function unknown	XP_003356898.2	coiled-coil domain-containing protein 96 [Sus scrofa]	sp|Q2M329|CCD96_HUMAN;	Coiled-coil domain-containing protein 96 OS=Homo sapiens OX=9606 GN=CCDC96 PE=2 SV=2;	PF13870.3	DUF4201	Domain of unknown function
MSTRG.7516		-	0.377	-1.40855	1.24324e-38	3.45886e-36	yes	down	1154.58	413.497	GO:0016021;GO:0070469;GO:0031966;GO:000813	CC:integral component of membrane;CC:respiratory chain;CC:mitochondrial membrane;MF:NADH dehydrogenas;	ENOG410YP23	C:Energy production and conversion	YP_009003931.1	NADH dehydrogenase subunit 6 (mitochondrion) [Sus verrucosus]	sp|O79882|NU6M_PIG;	NADH-ubiquinone oxidoreductase chain 6 OS=Sus scrofa OX=9823 GN=MT-ND6 PE=1 SV=1;	PF00499.20	Oxidored_q3	NADH-ubiquinone/plastoquinone oxidoreductase chain 6
MSTRG.4391		-	0.365	-1.45518	7.39225e-05	0.00162978	yes	down	1.20333	0.423333	------	------	------	------	XP_020954391.1	cullin-7 isoform X1 [Sus scrofa]	------	------	------	------	------
ENSSSCG00000024411		SMG8, nonsense mediated mRNA decay factor [Source:NCBI gene;Acc:100624639]	0.337	-1.57106	1.53029e-07	7.70752e-06	yes	down	1.4	0.456667	GO:0045859;GO:000018	BP:regulation of protein kinase activity;BP:nuclear-transcribed mRNA catabolic process, nonsense-mediated decay;	ENOG410Y30B	S:Function unknown	XP_003358167.2	protein SMG8 [Sus scrofa]	sp|A1A4J7|SMG8_BOVIN;	Protein SMG8 OS=Bos taurus OX=9913 GN=SMG8 PE=2 SV=2;	PF10220.6	DUF2146	Uncharacterized conserved protein
ENSSSCG00000018072		-	0.335	-1.57801	7.69954e-16	9.88672e-14	yes	down	41.5867	14.12	------	------	------	------	------	------	------	------	------	------	------
MSTRG.14478		-	0.313	-1.67686	3.23866e-27	6.20389e-25	yes	down	532.527	160.54	GO:0016021;GO:000573	CC:integral component of membrane;CC:mitochondrion;	------	------	AAA31986.1	ORF (mitochondrion) [Orcinus orca]	------	------	PF17704.1	DUF5550	Family of unknown function
MSTRG.8364		-	0.31	-1.68785	0.000222653	0.00395997	yes	down	8.26333	2.44667	------	------	------	------	XP_020954391.1	cullin-7 isoform X1 [Sus scrofa]	------	------	------	------	------
MSTRG.9136		-	0.295	-1.76066	2.55222e-09	1.73388e-07	yes	down	214.083	61.1233	------	------	------	------	CDP90914.1	Bm13240 [Brugia malayi]	------	------	------	------	------
ENSSSCG00000028663		-	0.274	-1.86582	3.11523e-29	6.27611e-27	yes	down	2.66	0.7	GO:0000381;GO:0006397;GO:0042981;GO:0016607;GO:0000166;GO:0003676;GO:000372	BP:regulation of alternative mRNA splicing, via spliceosome;BP:mRNA processing;BP:regulation of apoptotic process;CC:nuclear speck;MF:nucleotide binding;MF:nucleic acid binding;MF:mRNA binding;	ENOG410ZRGA	S:Function unknown	XP_002754129.1	PREDICTED: RNA-binding protein 25 [Callithrix jacchus]	sp|B2RY56|RBM25_MOUSE;	RNA-binding protein 25 OS=Mus musculus OX=10090 GN=Rbm25 PE=1 SV=2;	PF01480.14	PWI	PWI domain
ENSSSCG00000018063		-	0.217	-2.20373	4.16129e-11	3.82872e-09	yes	down	142.38	29.9167	------	------	ENOG41125ZN;COG0814	S:Function unknown;	BAE87620.1	unnamed protein product [Macaca fascicularis]	------	------	------	------	------
MSTRG.14569		-	0.194	-2.3631	1.00279e-28	1.95293e-26	yes	down	22.4133	4.25	------	------	------	------	------	------	------	------	------	------	------
MSTRG.10199		-	0.153	-2.70822	2.57892e-06	9.58507e-05	yes	down	8.62667	1.32333	------	------	------	------	XP_020922111.1	uncharacterized protein LOC110255939 isoform X3 [Sus scrofa]	------	------	------	------	------
MSTRG.8502		-	0.096	-3.38561	2.85838e-11	2.67202e-09	yes	down	1.01667	0.0933333	------	------	------	------	XP_004271676.1	PREDICTED: E3 ubiquitin-protein ligase KCMF1 [Orcinus orca]	------	------	------	------	------
MSTRG.13481		-	0	-14.9717	1.69022e-36	4.29352e-34	yes	down	138.083	0	GO:0009060;GO:0006119;GO:0045277;GO:0016021;GO:0005743;GO:0070469;GO:0004129;GO:0020037;GO:004687	BP:aerobic respiration;BP:oxidative phosphorylation;CC:respiratory chain complex IV;CC:integral component of membrane;CC:mitochondrial inner membrane;CC:respiratory chain;MF:cytochrome-c oxidase activity;MF:heme binding;MF:metal ion binding;	COG0843	C:Energy production and conversion	AEX55481.1	cytochrome oxidase subunit I, partial (mitochondrion) [Leopoldamys edwardsi]	sp|O79876|COX1_PIG;	Cytochrome c oxidase subunit 1 OS=Sus scrofa OX=9823 GN=MT-CO1 PE=3 SV=2;	------	------	------
